1           Chronic SSRI treatment reverses HIV-1 protein-mediated synaptodendritic damage

2

3

4   Adam R. Denton, Charles F. Mactutus, Almeera U. Lateef, Steven B. Harrod and Rosemarie M.

5

Booze\*

6

7

8   Behavioral Neuroscience Laboratory, Departments of Psychology, University of South Carolina,

9

Columbia, South Carolina

10

11

12

13

14

15

16

17

18

19

20

21

22

23

24   \*Corresponding Author: Rosemarie M. Booze ([booze@mailbox.sc.edu](mailto:booze@mailbox.sc.edu))

25

26 **Abstract**

27           HIV-1 infection affects approximately 37 million individuals and approximately 50% of  
28 seropositive individuals will develop symptoms of clinical depression and apathy. Dysfunctions  
29 of both serotonergic and dopaminergic neurotransmission have been implicated in the  
30 pathogenesis of motivational alterations. The present study evaluated the efficacy of a SSRI  
31 (escitalopram) in the HIV-1 transgenic (Tg) rat. Behavioral, neurochemical, and  
32 neuroanatomical outcomes with respect to HIV-1 and sex were evaluated to determine the  
33 efficacy of chronic escitalopram treatment. Escitalopram treatment restored function in each of  
34 the behavioral tasks that were sensitive to HIV-1 induced impairments. Further, escitalopram  
35 treatment restored HIV-1-mediated synaptodendritic damage in the nucleus accumbens;  
36 treatment with escitalopram significantly increased dendritic proliferation in HIV-1 Tg rats.  
37 However, restoration did not consistently occur with the neurochemical analysis in the HIV-1 rat.  
38 Taken together, these results suggest a role for SSRI therapies in repairing long-term HIV-1  
39 protein-mediated neuronal damage and restoring function.

40

41

42

43

44

45

46

47

## 48 **Introduction**

49           In the United States, approximately 50% of HIV-infected individuals will experience  
50 symptoms of clinical depression and/or apathy throughout their lifetime (Savetsky et al., 2001;  
51 Rabkin et al., 2008; Campos et al., 2010; Bhatia and Munjal, 2014, Castellon et al., 1998). The  
52 incidence of major depressive disorder in HIV seropositive individuals is roughly twice that of  
53 HIV seronegative individuals (Do et al., 2014 Pence et al., 2018; Arseniou et al., 2014; Mills et  
54 al., 2018). Comorbid depression remains a serious impediment to the successful treatment of  
55 HIV (Farinpour et al., 2003), with depression significantly impacting adherence to combination  
56 antiretroviral therapy (cART) and medical appointment attendance (Horberg et al., 2008; Pence  
57 et al., 2018; Yoo-Jeong et al., 2016).

58           Apathy remains a frequent psychological disturbance among HIV seropositive  
59 individuals, despite cART treatment. The persistence of apathetic symptoms despite treatment  
60 is not surprising given the close association between apathetic behavioral responses and  
61 clinical depression (Marin, Firinciogullari, and Biedrzycki, 1993), however, lending support to the  
62 notion that apathy and depression are dissociable is that they share a differential relationship, a  
63 dissociation, from neurocognitive performance in HIV seropositive subjects Castellon, et al.,  
64 1998). In addition to the described symptoms, roughly half of all individuals with HIV will develop  
65 some HIV-associated neurocognitive disorders (HAND) (Sanmarti, 2014; Bryant et al., 2015).

66           The development of apathy is a direct effect of HIV infection (McIntosh et al., 2015),  
67 proposed as a consequent to transactivator of transcription (Tat) and envelope glycoprotein  
68 (gp120) protein exposure (Bertrand et al., 2018). These proteins have been shown to produce  
69 harmful effects upon the neural circuitry underlying reward pathways, and the dopaminergic  
70 system more specifically (Illenberger et al., 2020). Dopaminergic dysfunction accompanying HIV  
71 infection has been examined in human brain tissue (Silvers et al., 2006; Kumar et al., 2011  
72 Purohit et al., 2011), cell culture systems (Aksenov et al., 2008; Bertrand et al., 2013) and in  
73 animals used to model symptoms of HIV infection. (Fitting et al., 2015; Javadi-Paydar et al.,

74 2017; Bertrand et al., 2018; Denton et al., 2019). HIV-1 induced dopaminergic disruption may  
75 play a critical role in apathy, which has been documented in the HIV-1 Tg rat, in response to  
76 DAT dysfunction and decreased dopamine levels (Javadi-Paydar et al., 2017; Bertrand et al.,  
77 2018; Denton et al., 2019).

78 The HIV-1 Tg rat brain contains seven of the nine genes that comprise the HIV viral  
79 genome, resulting in a non-infectious, long-term model of HIV-1 viral protein exposure (Reid et  
80 al., 2001; Vigorito et al., 2015 McLaurin et al., 2018). The HIV-1 Tg rat was initially generated  
81 using an infectious provirus derivation following the deletion of the *Sph1-Bal1* fragment that  
82 encompasses the *gag and pol* genes of the virus, rendering the HIV-1 Tg rat non-infectious  
83 (Reid et al., 2001). Production of proteins, such as tat and gp120 proteins, remains under the  
84 control of the LTR promoter. Viral proteins, such as tat, remain present in cerebrospinal fluid of  
85 HIV seropositive individuals despite suppressive antiretroviral therapy and thus continue the  
86 cycle of active transcription in the brain, in addition to producing oxidative stress and neuronal  
87 injury (Henderson et al., 2019). Moreover, the persistence of HIV-1 infected cells in the brain is  
88 associated with decreased neurocognitive performance despite long-term antiretroviral  
89 adherence (Spudich et al., 2019). Exposure to viral proteins tat and gp120 is further implicated  
90 in synaptic loss, which is present in both clinical populations and animal models (Toggas et al.,  
91 1994; Kim et al., 2008; Fitting et al., 2008; Bertrand et al., 2013; Bertrand et al., 2014; Festa et  
92 al., 2020).

93 The HIV-1 Tg rat has previously been demonstrated to have compromised  
94 synaptodendritic connectivity in the nucleus accumbens core region (Roscoe et al., 2014;  
95 McLaurin et al., 2018), and additionally, compromised dopaminergic and serotonergic function  
96 in the nucleus accumbens core and prefrontal cortex, respectively (Denton et al., 2019). Roscoe  
97 et al., (2014) reported a profound decrease in dendritic branching complexity in medium spiny  
98 neurons of the nucleus accumbens, which is sex-dependent (McLaurin et al., 2018). Moreover,  
99 it was reported that HIV-1 Tg rats demonstrated a distributional shift in spine length with HIV-1

100 Tg animals exhibiting shorter spine lengths in addition to decreased spine volume (Roscoe et  
101 al., 2014). These findings were extended by McLaurin et al., (2018), where it was reported that  
102 HIV-1 Tg rats exhibited a distributional shift in spine type, with an increased frequency of  
103 dendritic spines closer to the soma relative to more distal dendritic branches (McLaurin et al.,  
104 2018). HIV-1 induced alterations in synaptic connectivity may occur partially in response to viral  
105 proteins and inflammatory cytokines (Kim et al., 2008; Green et al., 2019). Moreover, synaptic  
106 loss has been associated with HAND (Ellis et al., 2009).

107         The impact of these alterations in dendritic complexity in the HIV-1 Tg rat has been  
108 demonstrated by *in-vivo* studies of neurotransmission in the HIV-1 Tg rat. Using fast-scan cyclic  
109 voltammetry techniques, HIV-1 Tg animals demonstrated diminished peak release of both  
110 extracellular dopamine in the nucleus accumbens and serotonin in the prefrontal cortex.  
111 Moreover, HIV-1 Tg rats exhibited altered reuptake kinetics for both dopamine and serotonin,  
112 relative to control animals (Denton et al., 2019), indicating reductions in DAT and SERT  
113 synaptic function. Collectively, these findings illustrate the highly reproducible structural and  
114 neurochemical changes that are present within the reward circuitry of the HIV-1 Tg rat  
115 (Illenberger et al., 2020), indicating a stable environment for testing neuroprotective and  
116 restorative therapeutic approaches.

117         Escitalopram is a commonly prescribed antidepressant. Escitalopram is a selective  
118 serotonin reuptake inhibitor (SSRI), and is one of the most selective SSRIs available, with an  
119 approximately 50% greater potency relative to R-citalopram (Braestrup and Sanchez, 2004).  
120 Escitalopram acts via the primary serotonin binding site of the serotonin transporter (SERT), in  
121 addition to the allosteric regulatory binding site of the SERT. Consequently, escitalopram is an  
122 effective medication for serotonin dysregulation (Braestrup and Sanchez, 2004). Moreover,  
123 studies examining acute escitalopram treatment in mice have demonstrated efficacy in  
124 increasing evoked serotonergic response. Saylor et al., (2019) examined the effects of acute  
125 escitalopram administration using fast-scan cyclic voltammetry (FSCV). Following an acute

126 dosage of escitalopram, a significant (50%) increase in serotonin response was observed  
127 (Saylor et al., 2019). In the current study chronic dosing of escitalopram was used, as long-term  
128 use of SSRI more fully characterizes typical SSRI treatment in the context of HIV-1 infection.

129         The present study examined (1) behavioral effects of escitalopram treatment, (2) real-  
130 time extracellular release and reuptake kinetics of dopamine and serotonin as measured by  
131 FSCV, and finally, (3) morphologic alterations in the nucleus accumbens in the HIV-1 Tg rat.  
132 Specifically, the behavioral effects of SSRI treatment in HIV-1 Tg and F344/N rats were  
133 determined using a five bottle choice sucrose concentration test, a modified hole board  
134 response, an elevated plus-maze task, pre-pulse inhibition (PPI) of the visual PPI and acoustic  
135 startle task, and a social behavior task. FSCV was performed following the conclusion of  
136 behavioral testing to evaluate dopamine and serotonin kinetics in vivo. Following sacrifice,  
137 dendritic complexity and branching of medium spiny neurons (MSN) in the nucleus accumbens  
138 were examined using confocal microscopy. Taken together, the present study sought to  
139 determine the functional and mechanistic profile of chronic escitalopram treatment in the HIV-1  
140 Tg rat, and establish the potential of SSRI therapeutics in treatment of HIV-1.

141

## 142 **Materials and Methods**

### 143 **Overall Experimental Design (Figure 1)**

144         Animals were implanted with a subcutaneous pellet of escitalopram and allowed to  
145 recover for one week. Following recovery, animals were tested for sucrose preference in the  
146 second week. In the third week, exploratory behavior was measured using a modified hole  
147 board task. Pre-pulse inhibition testing occurred during the fourth week, followed by elevated  
148 plus maze testing and social behavior testing in the fifth week (Denton, 2019). Following the  
149 conclusion of behavioral testing, animals were randomly assigned to undergo FSCV. Cage-  
150 paired animals not assigned to voltammetry studies were sacrificed for dendritic spine analysis.

### 151 **Subjects**

152 Adult animals (N=73; HIV-1 Tg, n=31; F344/N, n=42; Males, n=36; Females, n=44) were  
153 obtained from Envigo, (Indianapolis, IN) and pair-housed under targeted conditions of  $21^{\circ} \pm 2^{\circ}$   
154 C,  $50\% \pm 10\%$  relative humidity with a 12 hour light: dark (0700:1900 hours) cycle. Animals  
155 were pair-housed by both sex and genotype. Food (Pro-Lab Rat, Mouse, and Hamster chow #  
156 3000) and water were available *ad libitum* throughout the experiment. All behavioral tasks were  
157 conducted during diurnal hours and behavioral testing commenced at approximately 6 months  
158 of age.

### 159 **Drug Treatment**

160 Escitalopram (14.76 mg pellet = 4mg/kg for 40 days) (Sigma Aldrich, Saint Louis, MO) or  
161 placebo pellets (Innovative Research of America, Sarasota, FL) were subcutaneously implanted  
162 in the medial neck area of each animal. In brief, animals were anesthetized using a 2-3%  
163 concentration of Sevoflurane (Henry Schein Animal Health, Dublin, OH). A small  
164 (approximately 3 mm) subcutaneous pocket was made into which the pellet was placed.  
165 Incisions were then sutured and each animal was administered butorphanol and placed in a  
166 recovery chamber with a heating pad. Animals were monitored for one-week post-operatively  
167 before beginning behavioral testing.

### 168 **Estrous Cycle Tracking**

169 Vaginal lavage was performed at 0900 hours on each day of the testing period to  
170 determine the cycle stage of female rodents. Each lavage was performed with approximately 1  
171 mL of freshly prepared phosphate-buffered saline solution. The solution was administered to the  
172 vagina of the rat with a standard eyedropper and quickly retracted. The solution was then  
173 evaluated under a low-power light microscope to determine the cycle stage via cell type  
174 morphology (Booze et al., 1999; Westwood, 2008). All female rodents were behaviorally tested  
175 and sacrificed during the morning of diestrus.

### 176 **Methods- Behavioral Analyses**

#### 177 **Sucrose Preference**

178           Animals were individually placed in an empty testing chamber with free access to 0%,  
179   1%, 5%, 10% and 30% concentrations of sucrose solution in 100 ml graduated cylinders  
180   equipped with stopper and drinking tube (Ancare, Bellmore, NY). Habituation to the five bottles  
181   of sucrose occurred two consecutive days prior to the testing period using distilled H<sub>2</sub>O in place  
182   of sucrose (Denton, 2019). Following habituation, animals were tested in the morning at 1000  
183   hours for 30 minutes per day across five consecutive days. Sucrose consumption was  
184   measured both with respect to the meniscus and cylinder weight. Cylinder order was  
185   randomized daily using a Latin square design to control for any effect of cylinder position upon  
186   sucrose consumption (Bertrand et al., 2018; Denton et al., 2019).

### 187   **Modified Hole Board**

188           A custom made insert equipped with 16 equidistant 3.17 cm holes was placed inside a  
189   40 cm<sup>3</sup> locomotor activity chamber. Nose pokes into each hole were recorded by photocells  
190   placed below the custom insert. Each nose poke was recorded by FlexField Software (San  
191   Diego Instruments, San Diego CA). Following a 10 minute habituation period, recording  
192   sessions occurred for 10 minutes each day for 7 consecutive days. The apparatus was cleaned  
193   with a 10% ethanol solution following each testing period. Testing was performed in the  
194   presence of 70db background white noise in a darkened room to encourage exploratory  
195   behavior at approximately 1030 hours.

### 196   **Elevated Plus Maze**

197           Each animal received a single testing session in a 109 cm X 109 cm (2 open arm X 2  
198   closed arm) elevated plus-maze apparatus. Behavior was recorded by a camera mounted  
199   above the apparatus. Overall activity was recorded with SMART tracking software (San Diego  
200   Instruments, San Diego CA). The apparatus was cleaned with a 10% ethanol solution between  
201   consecutive trials. Female animals were tested while in diestrus to control for any effect of  
202   estrus cycle upon the exploration of the animal. Animals with failed trials were retested one



203 week later. The dependent measure was the time spent in the open arm of the apparatus out of  
204 a 10 minute session. Recording sessions occurred at approximately 1100 hours.

### 205 **Visual and Auditory Pre-pulse Inhibition of the Acoustic Startle Response**

206 Animals were placed in a startle chamber (SR-Lab Startle Reflex System, San Diego  
207 Instruments) enclosed in an isolation cabinet (Industrial Acoustic Company) and acclimated to  
208 the presence of 70dB background noise for 5 minutes at approximately 1400 hours. The  
209 subjects were then presented with a series of six pulse-only trials at 100dB (Denton, 2019).  
210 Following this acclimation period, subjects were presented with 36 prepulse trials of 85dB with  
211 interstimulus intervals (ISIs) of 0, 8, 40, 80, 120, and 4,000 milliseconds assigned in a Latin-  
212 square procedure. The stimulus occurred for 20 milliseconds. The 0 and 4000-millisecond  
213 intervals were included to provide a baseline acoustic startle response. The apparatus was  
214 cleaned thoroughly with a 10% ethanol solution between each session.

### 215 **Social and Play Behavior**

216 On the day of testing, animals were habituated to the testing room for 10 minutes.  
217 Animals were then placed into an empty testing chamber at approximately 1300 hours with a  
218 bodyweight and sex-matched novel partner. Rodent interaction was recorded for 10 minutes.  
219 Total interaction time was recorded as a dependent measure of social behavior. Females were  
220 tested in diestrus. Successive trials were conducted in previously cleaned cages to account for  
221 any bias due to novel olfactory cues or debris.

### 222 **Methods- Fast-Scan Cyclic Voltammetry**

#### 223 **Manufacture of Carbon Fiber Microelectrodes**

224 Carbon fiber microelectrodes were manufactured by aspirating 7  $\mu\text{m}$  diameter carbon-  
225 fibers (Goodfellow Inc, Coraopolis, PA) into glass capillaries (0.6 mm external diameter, 0.4 mm  
226 internal diameter, A-M Systems Inc., Sequim, WA). Fibers were sealed into the capillaries with a  
227 vertical pipette puller (Narishige Group, Tokyo, Japan). The exposed fiber was trimmed to  
228 approximately 50  $\mu\text{m}$  for evaluation of dopamine and precisely 150  $\mu\text{m}$  under a low-light power

229 microscope for evaluation of serotonin, as this length is critical for proper measurement of  
230 serotonin (Hashemi et al. 2009; Denton et al., 2019). Nafion, a cation exchange polymer, was  
231 electrodeposited onto the carbon fiber portion of each serotonin electrode and dried for 10  
232 minutes at 70° C (Hashemi et al. 2009; Denton et al., 2019).

### 233 **Implantation of Carbon Fiber Microelectrodes and Stimulating Pin**

234 Animals (n=40) were deeply anesthetized using 2-4% Sevoflurane approximately 6  
235 weeks after being implanted with either escitalopram or placebo pellets. The animal's head was  
236 placed into a stereotaxic apparatus (David Kopf Instruments, Tujunga, CA.), with a heating pad  
237 to maintain constant body temperature (Denton, 2019). Carbon fiber microelectrodes were  
238 placed into both the nucleus accumbens (AP: +2.6, ML: +1.6, DV: -5.8) and CA1/CA2 region of  
239 the hippocampus (AP: -5.5, ML: +5.0, DV: -4.0), for evaluation of dopamine and serotonin,  
240 respectively (Paxinos and Watson, 2014). A stainless steel stimulating electrode (Plastics One,  
241 Roanoke VA) was implanted in the medial forebrain bundle (AP: -2.8, ML: +1.7, DV: -8.0), while  
242 a silver reference electrode was placed in the hemisphere contralateral to the stimulating  
243 electrode. To stimulate the release of dopamine and serotonin, biphasic pulse trains were  
244 applied through a stimulus isolator (NL800A, Neurolog; Medical Systems Corp., Great Neck,  
245 NY). To evaluate the release of dopamine, a triangular waveform ranging from -0.4 volts to 1.3  
246 volts in amplitude was applied, while a triangular waveform ranging from 0.2 volts to 1.0 volts in  
247 amplitude was used for the evaluation of serotonin. Background-subtracted cyclic  
248 voltammograms were obtained as time vs. voltage (x-axis by y-axis). For both  
249 neurotransmitters, stimulation parameters were held at a frequency of 60 Hz, with 120 total stim  
250 pulses spaced 4ms apart and a stim to scan delay of 89.50ms. Following the conclusion of the  
251 recording session, animals were sacrificed under deep anesthesia. Brains were extracted and  
252 sectioned to verify current electrode placement.

253

### 254 **Methods-Ballistic Labeling of Medium Spiny Neurons in the Nucleus Accumbens**

## 255 **Preparation of Tezfel Tubing**

256 Tezful tubing (IDEX Health Sciences, Oak Harbor, WA) was cut and cleaned with a  
257 solution of polyvinylpyrrolidone (PVP) (EMD Millipore Corporation, Billerica, MA) and distilled  
258 H<sub>2</sub>O and allowed to sit at room temperature before use.

## 259 **Preparation of DiOlistic Cartridges**

260 Cartridges were constructed as previously described (Roscoe et al., 2014). Briefly,  
261 tungsten beads (Bio-Rad, Hercules, CA) and crystallized Dil (Invitrogen, Carlsbad, CA ) were  
262 dissolved in methylene chloride (Sigma-Aldrich, St. Louis, MO). Tungsten bead solution was  
263 applied to a standard glass slide before being treated with Dil solution and mixed until air-dried.  
264 The mixture was then removed from the slides and combined with distilled H<sub>2</sub>O prior to probe  
265 sonication with a Branson Sonifier 150 (Branson Ultrasonics, Danbury, CT). The solution was  
266 then drawn into the previously prepared Tezfel tubing and placed into a tubing prep station (Bio-  
267 Rad, Hercules, CA) for rotation until even distribution of the tungsten was achieved. The  
268 remaining liquid was drawn from the tubing with a syringe and nitrogen gas was blown through  
269 the tubing to ensure drying. The tubing was then cut into 13 mm segments and stored in a light-  
270 proof container.

## 271 **Ballistic Labeling of Medium Spiny Neurons**

272 Animals (N=33) that underwent behavioral testing (and not used for voltammetry) were  
273 sacrificed *via* transcardial perfusion (Variable speed peristaltic pump number 70730-064, VWR,  
274 Avantor) of approximately 100 mL of freshly prepared paraformaldehyde approximately 6 weeks  
275 after having been implanted with escitalopram or placebo pellets. Brains were then removed  
276 and stored in paraformaldehyde. All terminal sacrifices of female rats were conducted during the  
277 diestrus phase of the rat estrous cycle. Brains were sliced on a standard rat brain matrix (Ted  
278 Pella, Inc., Redding, CA) at a thickness of 500  $\mu$ m.

279 Five slices were taken from the nucleus accumbens of each animal and labeled with the  
280 Helios Gene Gun (Bio-Rad, Hercules, CA). Previously prepared cartridges were delivered at 70

281 psi through 3  $\mu\text{m}$  pore filter papers onto the tissue. Prepared slices were then washed with PBS  
282 and allowed to incubate at 4°C overnight. The following morning, all tissue was mounted and  
283 cover-slipped with Fisherbrand 22X50-1.5 glass coverslips (Fisher Scientific, Pittsburgh  
284 PA)(Roscoe et al., 2014; McLaurin et al., 2018). Slices were imaged with a Nikon TE- 2000E  
285 confocal microscope (pinhole size 30  $\mu\text{m}$ , pinhole projected radius 167 nm) using a green  
286 helium-neon laser with an emission of 533 nm (Nikon, Tokyo, Japan). Three neurons were  
287 imaged at both 20x and 60x magnification. 60x (n.a. = 1.4) images were traced for dendritic and  
288 spine complexity using NeuroLucida 360 (MBF Biosciences, Williston, TX). One neuron per  
289 animal was used to evaluate spine parameters using Neurolucida Explorer (MBF Biosciences,  
290 Williston, TX). Dendritic spines were classified according to backbone length using an algorithm  
291 internal to NeuroLucida 360 (Rodriguez et al., 2008). Length ( $\mu\text{m}$ ), volume ( $\mu\text{m}^3$ ), and head  
292 diameter ( $\mu\text{m}$ ) were evaluated for each neuron. Spine lengths were defined as between .01  $\mu\text{m}$   
293 and 4  $\mu\text{m}$  (Blanpied and Ehlers, 2004; Rusczycki et al., 2012) while spine volume was  
294 measured between 0.02  $\mu\text{m}^3$  and 0.2  $\mu\text{m}^3$  (Merino-Serrais et al., 2013; McLaurin et al., 2018).  
295 Spine head diameter was defined as between 0.3  $\mu\text{m}$  and 1.2  $\mu\text{m}$  (Bae et al., 2012). A Sholl  
296 analysis was performed to examine dendritic complexity as measured by the number of  
297 intersections at successive 10  $\mu\text{m}$  radii (Sholl, 1953).

298

## 299 **Data Analysis**

300 Statistical analyses were performed using analysis of variance (ANOVA) and regression  
301 techniques (SPSS Statistics 25, IBM Corp., Somers, NY; BMDP statistical software (release 8.1,  
302 Statistical Solutions Ltd, Cork, Ireland; SAS/STAT Software 9.4, SAS Institute, Inc., Cary, NC;  
303 GraphPad Software, Inc., Version 5.02, La Jolla, CA), where the alpha criterion of  $p \leq 0.05$  was  
304 considered to be statistically significant. Orthogonal decompositions the Greenhouse-Geisser df  
305 correction factor and/or logarithmic transformations were utilized to address potential violations  
306 of the compound symmetry assumption. Based on the *a priori* aims of the present study,

307 planned comparisons were conducted to evaluate the impact of chronic HIV-1 viral protein  
308 exposure (i.e., F344/N placebo vs. HIV-1 Tg placebo), the effect of escitalopram treatment in  
309 restoring function (i.e., HIV-1 Tg escitalopram vs. HIV-1 Tg placebo), and the magnitude of the  
310 escitalopram effect (i.e., HIV-1 escitalopram vs. F344/N placebo). All graphs were produced  
311 with GraphPad Software.

312 For evaluation of sucrose preference, a mixed model factorial ANOVA was utilized  
313 where genotype, sex, and treatment were held as between-subject factors where the variable  
314 concentration of sucrose was held as a within-subjects factor. Regression analyses were utilized  
315 to examine the concentration response curves. Similarly, a mixed model factorial ANOVA was  
316 used for evaluation of pre-pulse inhibition where transgene, sex, and treatment were held as  
317 between-subject factors where variable inter-stimulus interval was held as a within-subjects  
318 factor. To evaluate modified hole board, elevated-plus maze performance, and social behavior,  
319 a factorial ANOVA was employed to examine the effects of treatment, sex, and transgene.  
320 Rodent age was held as a covariate across all analyses.

321 Voltammetric recordings were obtained using customized software written in LabView  
322 (Knowmad Technologies LLC). Color plots of the evoked chemicals were generated within the  
323 data analysis features of the custom software. GraphPad Prism (version 5) was used to produce  
324 current versus time plots for each neurotransmitter of interest. Peak concentrations of  
325 neurotransmitter release were analyzed with a factorial ANOVA. Rates of release and reuptake  
326 of individual analytes were calculated using nonlinear regression where  $K$ , a nonlinear rate  
327 constant, was evaluated for both release and reuptake. Peak concentration values were  
328 obtained from the raw evoked electrical current.

329 Frequency distributions of spine parameters were compared using histograms of the  
330 entire data sets. Sholl analysis was performed using NeuroLucida Explorer to examine dendritic  
331 branching and complexity. A mixed model ANOVA and discriminant function analysis were used  
332 to analyze spine parameters obtained from Sholl analysis.

333

## 334 **Results**

### 335 **Sucrose Preference**

336           Sucrose consumption curves plotted as a function of sucrose concentration are illustrated  
337 in **Figure 2 (A-D)**. Significant effects of genotype were observed on sucrose consumption  
338 (**Figure 2A**) and indicated by a genotype by concentration interaction [ $F(4, 224) = 5.94$ ,  
339  $p \leq 0.0001$ ] with a prominent quadratic component [ $F(1, 56) = 6.18$ ,  $p \leq 0.016$ ]. Linear and non-  
340 linear modeling of the response curves to sucrose concentration further illustrated the HIV-1-  
341 mediated alteration. Specifically, dose-dependent responding to sucrose concentrations  
342 proceeded in a robust linear fashion ( $r^2 > 0.97$ ) in F344/N control animals whereas, in contrast,  
343 dose-dependent responding in HIV-1 Tg animals proceeded in a prominent quadratic fashion  
344 (one-phase association,  $r^2 > 0.97$ ). The difference in dose-response functions was not  
345 confounded with any positional or side bias of the animals as illustrated by mean sucrose  
346 consumption from each bottle position (**Figure 2B**). Differential effects of escitalopram  
347 treatment on the consumption curves were indicated between genotypes [ $F(4, 224) = 5.94$ ,  
348  $p \leq 0.0001$ ]. A prominent quadratic concentration by genotype by escitalopram interaction was  
349 revealed [ $F(1, 56) = 4.16$ ,  $p \leq 0.046$ ]. As shown, escitalopram did not alter sucrose consumption  
350 in the F344/N control animals; the dose-dependent sucrose consumption analysis revealed a  
351 global linear fit independent of escitalopram treatment ( $r^2 = 0.92$ ) (**Figure 2C**). However, for the  
352 HIV-1 Tg animals, escitalopram treatment restored the quadratic dose-response function  
353 ( $r^2 > 0.97$ ) to a prominent linear function ( $r^2 = 0.88$ ) (**Figure 2D**).

### 354 **Modified Hole Board**

355           Exploration in the modified hole board (**Figure 3A**), as indexed by nose poke behavior,  
356 was sensitive to the effect of both genotype and escitalopram treatment [genotype by  
357 escitalopram interaction,  $F(1, 56) = 12.18$ ,  $p \leq 0.0009$ ]. A significant effect of genotype was  
358 confirmed in the placebo treated animals [ $F(1, 56) = 10.01$ ,  $p \leq 0.0025$ ] with the HIV-1 Tg animals

359 displaying a greater number (>70%) of nose pokes than F344/N controls. It was also noted that  
360 there was no longer an effect of genotype after escitalopram treatment [ $F(1,56)= 2.79, p\geq 0.10$ ].  
361 Escitalopram treatment significantly decreased the number of nose pokes in HIV-1 Tg animals  
362 towards the levels of F344/N placebo controls [ $F(1, 56) =5.28, p\leq 0.025$ ]. In contrast,  
363 escitalopram treatment increased the number of nose pokes in F344/N controls significantly  
364 above their placebo levels, an effect driven by the female animals [ $F(1, 56) =7.92, p\leq 0.007$ ].

### 365 **Elevated Plus Maze**

366 Exploration time in the elevated plus maze (**Figure 3B**) was less sensitive to an effect of  
367 the HIV-1 transgene [ $F(1, 72) =2.46, p>0.10$ ], an effect clearly absent in both the females [ $F(1,$   
368  $72) <1.0$ ] but also not compelling in the male animals [ $F(1, 72) =3.69, p=0.059$ ]. In the absence  
369 of a genotype effect, the evidence for an effect of escitalopram therapy was not expected nor  
370 observed. The overall increased exploration in female animals (independent of genotype) after  
371 repeated escitalopram treatment failed to meet statistical significance [ $F(1, 72) =3.01, p=0.087$ ].

### 372 **Social and Play Behavior**

373 Total interaction time, recorded as the dependent measure of social behavior (**Figure**  
374 **3C**), was insensitive to the effects of the HIV-1 transgene, escitalopram treatment, or their  
375 interaction [all  $F_s < 1.0$ ]. There was also no effect of sex, but a three-way interaction of  
376 genotype by sex by treatment was confirmed [ $F(1,66)=4.27, p\leq 0.043$ ]. Interpretation of that  
377 latter term was guided by the significant two-way interaction of escitalopram treatment by sex in  
378 the F344/N animals [ $F(1,66)=4.26, p\leq 0.043$ ] and of the genotype by sex two-way interaction in  
379 the escitalopram treated animals [ $F(1,66)=6.67, p\leq 0.012$ ]. The presence of the differential  
380 genotype by sex effect is illustrated in the right panel of **Figure 3C** with  $M>F$  in F344/N vs  $F>M$   
381 in HIV-1 Tg animals. The modulation of social behavior by escitalopram was not expected nor  
382 particularly relevant to its therapeutic potential given the insensitivity of the task to a genotype  
383 effect.

### 384 **Visual Pre-pulse Inhibition of the Acoustic Startle Response**

385 Visual PPI was sensitive to both genotype and escitalopram treatment (**Figure 4A-4D**).  
386 As illustrated, a significant main effect of genotype [ $F(1,34)=10.26$ ,  $p\leq 0.0029$ ] accompanied by a  
387 prominent quadratic ISI by genotype interaction [ $F(1,34)=12.02$ ,  $p\leq 0.0014$ ] demonstrated a  
388 significant impairment in preattentive processing of the HIV-1 Tg animals relative to F344/N  
389 controls (**Figure 4A**). Further specific comparison of the ISI curves of the placebo treated  
390 animals of both genotypes revealed that the response amplitudes of the HIV-1 Tg animals were  
391 significantly less sensitive to response modulation by the ISI than F344/N controls  
392 [ $F(5,170)=5.31$ ,  $p\leq 0.005$ ]. There was no effect of sex nor interaction of sex with genotype or  
393 escitalopram or with ISI [ $F_s < 1.0$ ] (**Figure 4B**). Escitalopram treatment did not appear to  
394 significantly alter the ISI curves of the F344/N animals (**Figure 4C**). In contrast, escitalopram  
395 treatment did significantly shift the shape of the ISI curves of the HIV-1 Tg animals toward that  
396 of the F344/N control animals, imparting a greater sensitivity to modulation by the ISI  
397 [ $F(5,170)=4.08$ ,  $p\leq 0.02$ ] (**Figure 4D**). Thus, in the presence of a significant genotype  
398 impairment in temporal sensitivity treatment with escitalopram was able to significantly restore  
399 functionality towards that of F344/N controls.

#### 400 **Auditory Pre-pulse Inhibition of the Acoustic Startle Response**

401 Auditory PPI was also sensitive to both genotype and escitalopram treatment (**Figure**  
402 **5A-5D**). As illustrated, a significant main effect of genotype [ $F(1,37)=9.69$ ,  $p\leq 0.0036$ ]  
403 accompanied by a prominent quadratic ISI by genotype interaction [ $F(1,37)=8.97$ ,  $p\leq 0.005$ ]  
404 demonstrated a significant impairment in preattentive processing of the HIV-1 Tg animals  
405 relative to F344/N controls (**Figure 5A**). Further specific comparison of the ISI curves of the  
406 placebo treated animals of both genotypes revealed that the response amplitudes of the HIV-1  
407 Tg animals were significantly less sensitive to response modulation by the ISI than F344/N  
408 controls [ $F(5,170) = 5.31$ ,  $p\leq 0.008$ ]. There was no effect of sex nor interaction of sex with  
409 genotype or escitalopram or with ISI [ $F_s < 2.0$ ] (**Figure 5B**). Escitalopram treatment did not  
410 appear to significantly alter the ISI curves of the F344/N animals (**Figure 5C**). Although



411 escitalopram treatment appeared to shift the shape of the ISI curves of the HIV-1 Tg animals  
412 toward that of the F344/N control animals (**Figure 5D**; peak inflection away from 200 msec), a  
413 significant difference between the ISI curves remained between the two genotype groups  
414 [ $F(5,185) = 3.87, p \leq 0.038$ ]. Overall, in the presence of a significant genotype impairment in  
415 temporal sensitivity escitalopram was able to facilitate a partial restoration of functionality  
416 towards that of F344/N controls.

### 417 **Dopamine and Serotonin Voltammetry**

418 Decreases in peak transmission and reuptake of dopamine (**Figure 6A-C**) and serotonin  
419 (**Figure 7A-C**) were found in the HIV-1 Tg rat. Maximal evoked concentration ( $C_{max}$ ) was  
420 impaired in transgenic animals across both dopamine and serotonin recordings. [Dopamine,  
421  $F(1,9) = 33.25, p \leq 0.001$ ; Serotonin,  $F(1,16) = 60.97, p \leq 0.001$ ]. Additionally, rates of reuptake as  
422 defined by the nonlinear rate constant ( $k$ ) were impaired in transgenic animals relative to control  
423 animals (Denton, 2019). [Dopamine, F344/N  $K = 0.43$ , HIV-1Tg  $K = 0.73$   $F(1,2634) = 19.19$ ,  
424  $p \leq 0.001$ ; Serotonin, F344/N  $K = 0.37$ , HIV-1Tg  $K = 0.56$   $F(1,4314) = 7.308, p \leq 0.05$ .]

425 No statistically significant differences relative to control were found for dopamine  
426 transmission in HIV-1 Tg rats treated with escitalopram [ $F(91,150) = 1.00, p \geq 0.05$  (**Figure 6D-**  
427 **E**). Evoked rates of maximal dopamine release were not statistically significant across a  
428 genotype by treatment analysis [ $F(1,18) = 0.123, p \geq 0.05$ .], though HIV-animals treated with  
429 SSRI medication demonstrated the lowest peak concentration. Rates of reuptake were not  
430 statistically different for HIV-1 Tg animals treated with escitalopram, compared to control  
431 [ $k = 0.41$   $F(1,1414) = 0.47, p \geq 0.05$ ], though F344/N animals treated with escitalopram  
432 demonstrated slower rates of reuptake than animals treated with placebo [ $k = 0.49$  vs.  $k = 0.23$   
433  $F(1,3834) = 16.1, p \leq 0.001$ ] (Denton, 2019).

434 Increases in serotonin transmission were found in F344/N control animals treated with  
435 escitalopram, but not in HIV-1 Tg rodents (**Figure 7D-E**). Rates of clearance (reuptake) were  
436 slower in animals treated with escitalopram ( $k = 0.55$ ) relative to animals treated with placebo

437 ( $k=0.34$ ) [ $F(1,4074)=9.18$ ,  $p\leq 0.05$ ]. While F344/N animals treated with escitalopram displayed a  
438 55% increase in peak evoked serotonergic potential, the effect was not significant  
439 [ $F(1,30)=0.99$ ,  $p=ns$ ] although rates of reuptake were altered for animals treated with  
440 escitalopram [ $k=0.32$  vs.  $k=0.20$   $F(1,7674)=23.75$ ,  $p\leq 0.01$ ].

#### 441 **Medium Spiny Neuron Branching/Morphology**

442 Overall, MSNs of HIV-1 Tg animals treated with escitalopram exhibited greater dendritic  
443 length, volume, and intersections at distal radii, demonstrating that escitalopram was effective in  
444 promoting dendritic complexity and proliferation in the nucleus accumbens of HIV-1 Tg animals.  
445 Frequency distributions of spine length of medium spiny neurons in the nucleus accumbens  
446 revealed a genotype/treatment interaction effect with escitalopram altering length distributions  
447 for both HIV-1 Tg and F344/N animals (**Figure 8A-B**). However, escitalopram did not appear to  
448 alter frequency distributions for head diameter or volume. Moreover, escitalopram appeared to  
449 alter spine morphology in HIV-1 Tg rats, as individuals treated with escitalopram exhibited  
450 higher frequencies of stubby and mushroom spine types across successive radii when  
451 compared with placebo-treated HIV-1 Tg animals (**Figure 8C-D**). Sholl analysis revealed a  
452 statistically significant interaction effect for treatment and genotype upon dendritic proliferation.  
453 HIV-1 Tg animals demonstrated markedly less dendritic complexity when compared with control  
454 counterparts. However, treatment with escitalopram served to dramatically improve dendritic  
455 complexity in HIV-1 Tg animals, even normalizing animals to control levels with respect to  
456 dendritic intersections at concentric radii (**Figure 9A-B**). [ $F(1,8)=5.34$ ,  $p<0.05$ ]. A similar effect  
457 was found with respect to length and volume, although the effects were not statistically  
458 significant [ $F(1,13)=2.18$ ,  $p\geq 0.05$ ;  $F(1,13)=1.51$ ,  $p\geq 0.05$ , respectively]. Additionally, a  
459 discriminant function analysis with jackknife resampling procedure was performed to determine  
460 whether animals could be accurately classified into treatment groups (placebo vs. escitalopram)  
461 based upon dendrite intersections obtained from the Sholl analysis. Using the parameter of

462 dendrite intersection/radii for each of the concentric radii, animals were correctly classified into  
463 treatment groups with 100% accuracy [Wilks'  $\lambda=0.216$ ,  $\chi^2_{(12)}=26.02$ ,  $p\leq 0.05$ ].

464  
465 **Discussion**

466       Chronic escitalopram treatment significantly increased dendritic complexity and altered  
467 spine morphology in the HIV-1 Tg rat. Previous reports found extensive HIV-induced damage to  
468 MSNs in the nucleus accumbens of HIV-1 Tg rats (Roscoe et al., 2014; McLaurin et al., 2018)  
469 thus, synaptodendritic restoration may be a key target for therapeutic intervention. We found  
470 that chronic escitalopram administration was successful in restoring dendritic complexity to  
471 MSNs in the nucleus accumbens of HIV-1 Tg rats, even to control levels. These findings  
472 suggest therapeutic efficacy for escitalopram in repairing HIV-mediated damage in the nucleus  
473 accumbens. The behavioral and preattentive processing tasks that were sensitive to  
474 impairments in the HIV-1 Tg animals were also sensitive to demonstrating functional  
475 improvements with escitalopram treatment. However, escitalopram treatment did not restore  
476 neurotransmission deficits in HIV-1 Tg rats. Serotonergic functioning in F344 animals was  
477 improved by escitalopram treatment; in contrast, HIV-1 Tg animals treated with escitalopram  
478 failed to display an increase in serotonergic functioning. Nevertheless, escitalopram treatment  
479 represents an important first step toward effective therapeutic intervention in repairing HIV-  
480 mediated synaptodendritic damage and restoring functional impairments following exposure to  
481 HIV-1 proteins. A summary of the observed effects is included in Figure 10.

482       Simultaneous decreases in release and reuptake rates for dopamine and serotonin  
483 activity were found in HIV-1 Tg rats, relative to F344/N controls. Dopaminergic impairments in  
484 the nucleus accumbens are consistent with previous research (Javadi-Paydar et al. 2017),  
485 which employed *ex vivo* striatal brain slices to examine DA reuptake in HIV-1 Tg rats. Moreover,  
486 the present findings are consistent with previous reports (Denton et al., 2019), which  
487 demonstrated severe monoamine dysfunction in intact HIV-1 Tg rats. Specifically, dopaminergic

488 functioning in the HIV-1 Tg rat following long-term HIV-1 protein exposure is characterized by  
489 slower reuptake rates from diminished peak concentrations of dopamine. (Denton et al., 2019).  
490 These findings are consistent with both preclinical PET imaging studies (Sinharay et al. 2017)  
491 and clinical PET imaging studies (Chang et al. 2008). Acute in vivo studies (Ferris et al., 2009)  
492 reported decreased extracellular striatal dopamine concentrations following HIV-1 Tat protein  
493 infusion. In contrast, others have reported transitory increases in dopamine levels in the nucleus  
494 accumbens (at 3 days; Kesby et al., 2016a) which did not persist (absent at 10 days; Kesby et  
495 al., 2016b), following acute induction of Tat protein expression in astrocytes (Kesby et al.,  
496 2017). The inconsistency of dopamine levels following acute Tat protein exposure is further  
497 illustrated by the puzzling findings of increased dopamine concentrations in the prefrontal cortex  
498 at 7 days post-induction of Tat, without any accompanying changes in striatal dopamine levels  
499 (Strauss et al., 2020). Although it is difficult to reconcile findings from acute studies (i.e, 1-2  
500 weeks) in terms of dopaminergic alterations following HIV-1 protein exposure (i.e., reports of  
501 regionally specific increases, decreases, and no changes in dopamine), with findings from  
502 chronic HIV-1 protein exposure (months to years via the HIV-1 Tg rat, i.e., similar to long-term  
503 HIV-1 exposure in humans) which clearly and reliably show decreased extracellular dopamine  
504 levels and impairs mesocorticolimbic circuit neurotransmission (for review, see Illenberger et al.,  
505 2020; Bertrand et al., 2018). The decreases in dopaminergic functioning play a key role in HIV-1  
506 apathy (Bertrand et al., 2018) and HAND (Moran et al., 2019; McLaurin et al., 2020).

507         The nucleus accumbens core and shell regions receive dense input from serotonergic  
508 neurons from the raphe nucleus (Van Bockstaele et al., 1993). The shell region of the nucleus  
509 accumbens contains axons and axon terminals that are of larger diameter and greater varicosity  
510 than those observed in the nucleus accumbens core region. Axon terminals in the nucleus  
511 accumbens core contain vesicles of greater density and form symmetrical synaptic contact with  
512 dendrites in this region. Consequently, serotonin has been reported to regulate dopamine  
513 release within the nucleus accumbens in both an excitatory and inhibitory manner (Parsons et

514 al., 1993). Serotonin has been shown to increase dialysate dopamine in the nucleus  
515 accumbens (Parsons et al., 1993), whereas 5-HT<sub>2C</sub> receptor agonists have been shown to  
516 decrease mesocorticolimbic dopamine function, with 5-HT<sub>2C</sub> antagonists showing the opposite  
517 effect (Di Matteo et al., 2001). Thus, interactions between serotonin and dopamine might be  
518 anticipated in the HIV-1 Tg rat, and in these studies both neurochemical systems reacted  
519 similarly to long-term HIV-1 protein exposure.

520 Presently, we report no sex differences in dopaminergic transmission between male and  
521 female rats. These findings are in line with previous studies from our laboratory employing fast-  
522 scan cyclic voltammetry which did not elucidate an effect of sex in dopaminergic release or  
523 reuptake (Denton et al., 2019). Moreover, these findings are in line with findings from  
524 microdialysis studies examining sex differences in dopamine between male and female rats  
525 (Egenrieder et al., 2020). In a review and meta-analysis, Egenrieder and colleagues (2020)  
526 report that there are consistently no sex differences in dopamine levels in either the caudate  
527 putamen or nucleus accumbens. In the current studies, female animals were sacrificed on the  
528 day of diestrus; an estrus stage of low ovarian hormone levels. Our prior studies (Bertrand et al.,  
529 2018) were conducted in ovariectomized female animals. Future studies may study the role of  
530 ovarian hormones across the estrus cycle to determine how estrogen and progesterone levels  
531 may impact dopaminergic and serotonergic function in the HIV-1 Tg rat.

532 Serotonin transmission using FSCV is characterized by a quick rise to peak evoked  
533 concentration followed by reuptake mechanisms specific to the site being measured (West et  
534 al., 2018; Abdalla et al., 2019). These site-specific uptake phases were identified as Uptake 1  
535 and Uptake 2 (Shaskan and Snyder 1970). Uptake 1 occurs as a result of the activity of the  
536 (SERT). Consequently, Uptake 1 is characterized by a high affinity for serotonin molecules but  
537 low efficiency. Studies of serotonin recordings in mice have characterized Uptake 1 as a single  
538 decay curve from peak concentration that is relatively slow and persists for approximately 12  
539 seconds. Uptake 2 occurs as a result of non-SERT transporters and is characterized by higher

540 efficiency, but lower capacity and affinity. Studies in mice have shown that Uptake 2 has a much  
541 shorter decay curve that reaches baseline activity quickly (Abdalla et al., 2019). These studies  
542 have further suggested that serotonin release in the hippocampus is largely mediated by Uptake  
543 2 (non-SERT) mechanisms (West et al., 2018; Abdalla et al., 2019). Such findings may  
544 potentially explain why escitalopram was not found to alter serotonin kinetics in HIV-1 Tg  
545 animals in the present study. Escitalopram is known for its high affinity for SERT (Braestrup and  
546 Sanchez, 2004), but as the kinetics of hippocampal serotonin do not appear to be as highly  
547 mediated by SERT, the present findings may result from escitalopram failing to mediate  
548 hippocampal specific serotonin kinetics, such as Uptake 1. Future experiments examining  
549 prefrontal cortex kinetics using FSCV, (previous research from our lab has indicated  
550 synaptodendritic and functional impairment in the PFC – McLaurin et al., 2018; Denton et al.,  
551 2019), would be informative relative to the role of SERT in HIV-1.

552         Synaptic loss, without neuronal death, is associated with HIV-1 and likely underlies  
553 neurocognitive impairments (Everall et al., 1999; Ellis et al., 2009). As HIV-1 does not directly  
554 infect neurons, synaptic loss is a result of exposure to viral products such as HIV Tat and gp120  
555 (Fitting et al., 2015). Specifically, the cysteine-rich region of the Tat protein has been shown to  
556 play a critical role in the development of synaptic loss (Bertrand et al., 2013). Synaptic damage  
557 may be a result of Tat-produced proteasome-mediated degradation of micro-tubule-associated  
558 protein 2 (MAP2), which consequentially results in a collapse of cytoskeletal filaments and  
559 spine/synaptic loss (Kim et al., 2008). Whereas cellular death requires calcium-mediated  
560 neuronal nitric oxide synthesis, synaptic damage associated with Tat is not mediated by nNOS,  
561 but rather ubiquitin-proteasomal pathways (Aprea et al., 2006; Kim et al., 2008). HIV-induced  
562 synaptic loss may result from a compensatory process to avoid cellular death (Green et al.,  
563 2019), thereby altering circuit connectivity (Illenberger et al., 2020). HIV viral proteins and  
564 inflammatory cytokines in the brain result in excessive activation of glutamatergic pathways,  
565 particularly in the frontostriatal pathways, which are critical for apathy. Previous reports highlight

566 the potential reversibility of HIV-1 induced dendritic damage, including the present report (Kim et  
567 al., 2008; Kim et al., 2011; Bertrand et al., 2014). More research is needed to more fully  
568 elucidate effective treatments for HIV-1 induced synaptodendritic damage, although  
569 phytoestrogen treatment (Bertrand et al., 2014; McLaurin et al., 2020), cannabinoid receptor  
570 activation (Kim et al., 2011), and the presently discussed SSRI treatment are promising  
571 treatment avenues. Moreover, functional endpoints of neurocognition are essential (McLaurin et  
572 al., 2019) in any assessments of neurorestorative treatments for apathy and HAND.

573         What is unclear from the present findings, however, is why escitalopram-mediated  
574 improvement in the dendritic spine profile did not produce a likewise improvement in  
575 neurochemistry, particularly regarding dopaminergic functioning in the nucleus accumbens. The  
576 present finding that escitalopram treatment increased mushroom spine proliferation, suggests  
577 the potential to rectify many of the deleterious effects of HIV-1. Mushroom spines are  
578 associated with the upper limits of synaptic strength and represent mature synaptic connections  
579 (Yuste, 2010; Berry & Nedivi, 2017). Moreover, these spine subtypes have the largest spine  
580 head volume of all spine subtypes, which correlates to a larger pre-synaptic zone and post-  
581 synaptic density. Increased size of the post-synaptic density is furthermore correlated with both  
582 the size of the active pre-synaptic zone and the number of docked pre-synaptic vesicles (Berry  
583 & Nedivi, 2017). Escitalopram treatment also increased in stubby spine subtypes. The stubby  
584 spine types may have little to offer in the context of neurotransmission, as their shape and lack  
585 of a voluminous head do not engender effective neuronal communication when compared to  
586 spine subtypes such as thin or mushroom (Yuste, 2010; Bae et al., 2012). Though stubby spine  
587 populations are maintained in the adult brain, they are typically considered to be markers of  
588 incomplete synaptic development (Yuste, 2010; Berry & Nedivi, 2017). Moreover, increases in  
589 stubby spine proliferation are often associated with neuropathology, including clinical  
590 depression (Buyukdura et al., 2013). The findings that escitalopram increases both mushroom

591 and stubby subtypes suggest that escitalopram treatment may be a first step toward repair of  
592 HIV-mediated damage in the nucleus accumbens.

593         The most likely explanation for why an increase in neurotransmission was not observed  
594 is the timing of the present investigations, coupled with the likelihood that full restoration of  
595 neurochemical processes and circuitry occurs slower than the formation of dendritic spines.  
596 Such a hypothesis would explain why escitalopram produced an increase in spine subtypes  
597 conventionally associated with immaturity while likewise increasing populations of those types  
598 that represent the upper limits of synaptic strength. Future studies of chronic escitalopram may  
599 show increased neurotransmission if measured at longer times from treatment onset. Thus,  
600 while escitalopram has the potential to dramatically increase dendritic branching and spine  
601 proliferation within six weeks of treatment, SSRI therapies may require a longer treatment  
602 period to reach full effect. Nevertheless, spine loss in the context of HIV-1 can be recovered by  
603 therapeutic intervention. Full recovery of circuit potential may take longer than changes in  
604 dendritic spines, thus a longer investigation may observe the full restoration of circuit  
605 connectivity and attenuation of dopaminergic and serotonergic deficits following treatment with  
606 escitalopram.

607         Visual and auditory PPI impairments in the HIV-1 Tg rat have been consistently reported  
608 by our laboratory (Moran et al., 2013; McLaurin et al., 2016; McLaurin et al., 2017; McLaurin et  
609 al., 2018). SSRI treatment was effective in restoring function for both visual or auditory PPI  
610 deficits in the HIV-1 Tg rat, albeit the evidence was stronger for the visual PPI task. HIV-1 Tg  
611 animals displayed consistent abnormalities in PPI across interstimulus interval (ISI). The  
612 additional behavioral tasks that were sensitive to the HIV-1 transgene, e.g., sucrose preference  
613 and hole board, both also displayed convincing evidence of restoration of function with  
614 escitalopram treatment. The curvilinear shift in response to variable sucrose concentration  
615 observed for HIV- Tg rats was restored to a linear function with escitalopram. The observed  
616 curvilinear shift in sucrose concentration responses for HIV-1 Tg rats is a novel finding within



617 the literature, as previous reports have not indicated a significant difference between sucrose  
618 response in HIV-Tg and F344 animals (Bertrand et al., 2018); however, that prior report was  
619 conducted with ovariectomized female animals. Rodent performance in the modified hole board  
620 revealed a statistically significant effect of genotype, with a prominent increase in nose poke  
621 behavior of the HIV-1 Tg animals. Escitalopram treatment significantly reduced that exploratory  
622 behavior to approximate F344/N control levels. Neither the plus maze nor social behavior tasks  
623 were particularly sensitive to any impairment by the HIV-1 transgene; given this insensitivity no  
624 specific therapeutic effect of escitalopram would be expected. Overall, escitalopram was quite  
625 effective at modulating behavioral responses in HIV-1 Tg rats in each and every task that was  
626 sensitive to detecting HIV-1 protein induced impairments, suggesting escitalopram enabled  
627 functional recovery from HIV-1.

## 628 **Conclusions**

629 In the present study, therapeutic efficacy of escitalopram was found in treating HIV-1 Tg  
630 rats when examining spine complexity, as SSRI treatment was found to increase dendritic  
631 proliferation in HIV-1 Tg rats and consequently normalize these animals to control levels of  
632 complexity and proliferation. Similarly, the therapeutic efficacy of escitalopram was suggested in  
633 each of the behavioral tasks that were sensitive to impairments produced by the HIV-1  
634 transgene. Given that the present findings reveal that escitalopram did not improve  
635 serotonergic tone in the HIV-1 Tg rat, but increased transmission in control rats, it is likely the  
636 case that dendritic repair precedes restoration of circuit neurotransmission and function. In  
637 sum, chronic escitalopram treatment is an effective therapeutic approach for HIV-1 mediated  
638 synaptodendritic damage as well as for HIV-1 induced behavioral impairments, and moreover,  
639 has the potential for repair of HIV-1 neurological deficits and functional restoration of HAND.  
640

641 **Compliance with Ethical Standards**

642 This experiment was conducted in accordance with the recommendations of the National  
643 Institute of Health's Guide for the Care and Use of Laboratory Animals. Research protocols  
644 used were approved by the University of South Carolina Institutional Animal Care and Use  
645 Committee (assurance number: D16-00028). Additionally, the authors report no conflicts of  
646 interest or competing financial interests.

647

648 **Acknowledgments**

649 This research was supported by National Institute of Health Grants NS100624, DA013137,  
650 HD043680, MH106392 & by a National Institute of Health T32 Training Grant 5T32GM081740.  
651 The authors acknowledge and thank Dr. Michael Cranston and Dr. Hailong Li for their  
652 assistance with this project.

653

654 **References**

- 655 Abdalla A, West A, Jin Y, Saylor R, Qiang B, Pena E, (...) Hashemi P (2019) Fast serotonin  
656 voltammetry as a versatile tool for mapping dynamic tissue architecture: I. Responses at  
657 carbon fibers describe local tissue physiology. *J. Neurochem* doi:10.1111/jnc.14854
- 658 Aksenov MY, Aksenova MV, Silvers JM, Mactutus CF, Booze RM (2008) Different effects of  
659 selective dopamine uptake inhibitors GBR 12909 and WIN 35428 on HIV-1 Tat toxicity in  
660 rat fetal midbrain neurons. *Neurotoxicology* 29:971-977
- 661 Aprea S, Del Valle L, Mameli G, Sawaya BE, Khalili K, Peruzzi F (2006) Tubulin-mediated  
662 binding of human immunodeficiency virus-1 Tat to the cytoskeleton causes proteasomal-  
663 dependent degradation of microtubule-associated protein 2 and neuronal damage. *J*  
664 *Neurosci* 26:4054-4062.
- 665 Arseniou S, Arvaniti A, Samakouri M (2014) HIV infection and depression. *Psychiatry Clin*  
666 *Neurosci* 68:96-109
- 667 Bae J, Sung BH, Cho IH, Kim SM, Song WK. (2012) NESH regulates dendritic spine  
668 morphology and synapse formation. *PLoS One* 7:e34677
- 669 Berry KP, Nedivi E (2017). Spine dynamics: Are they all the same? *Neuron*, 96,  
670 doi:10.1016/j.neuron.2017.08.008.
- 671 Bertrand SJ, Aksenova MV, Mactutus CF, Booze, RM (2013) HIV-1 Tat protein variants: Critical  
672 role for the cysteine region in synaptodendritic injury. *Exp Neurol* 248:228-235.
- 673 Bertrand SJ, Mactutus CF, Aksenova MV, Espensen-SturgesTD, Booze RM (2014)  
674 Synaptodendritic recovery following HIV Tat exposure: neurorestoration by  
675 phytoestrogens. *J Neurochem*128:140–151
- 676 Bertrand SJ, Mactutus CF, Harrod SB, Moran LM, Booze, RM (2018) HIV-1 proteins  
677 dysregulate motivational processes and dopamine circuitry. *Sci Rep*  
678 doi:10.1038/s41598-018-25109-0

- 679 Bhatia MS, Munjal S. (2014). Prevalence of depression in people living with HIV/AIDS  
680 undergoing ART and factors associated with it. *J Clin Diagn Res*, 8:WC01-WC04.
- 681 Blanpied TA, Ehlers MD (2004). Microanatomy of dendritic spines: emerging principles of  
682 synaptic pathology in psychiatric and neurological disease. *Biol Psychiatry* 55:1121-1127
- 683 Booze RM, Wood ML, Welch MA, Berry S, Mactutus CF (1999) Estrous cyclicity and behavioral  
684 sensitization in female rats following repeated intravenous cocaine administration.  
685 *Pharmacol, Biochem and Behav* 64:605-610
- 686 Braestrup C, Sanchez C (2004). Escitalopram: a unique mechanism of action. *Internat J Psy*  
687 *Clinical Practice*:11-13.
- 688 Bryant VE, Whitehead NE, Burrell LE, Dotson VM, Cook RL, Malloy P, Devlin K., Cohen, R.A.  
689 (2015) Depression and apathy among people living with HIV: Implications for treatment  
690 of HIV associated neurocognitive disorders. *AIDS Behav*, 19:1430-1437
- 691 Budygin, E.A., Phillips, P.E.M., Robinson, D.L., Kennedy, A.P., Gainetdinov, R.R., & Wightman,  
692 R.M. (2001). Effect of acute ethanol on striatal dopamine neurotransmission in  
693 ambulatory rats. *J Pharmacol Exp Thera*, 297: 27-34.
- 694 Buyukdura JS, McClintock, SM Croarkin, PE (2013). Psychomotor retardation in depression:  
695 Biological underpinnings, measurement and treatment. *Progress in Neuropsychopharm*  
696 *Bio Psyc*, 35: 395-409
- 697 Campos LN, Guimaraes MD, Remien RH (2010). Anxiety and depression symptoms as risk  
698 factors for non-adherence to antiretroviral therapy in Brazil. *AIDS Behav* 14: 289-299.
- 699 Castellon SA, Hinkin CH, Wood S, Yarema KT (1998) Apathy, depression, and cognitive  
700 performance in HIV-1 infection. *J Neuropsych* 10:320-328
- 701 Chang L, Wang GJ, Volkow ND, Ernst T, Telang F, Logan J, Fowler JS (2008) Decreased brain  
702 dopamine transporters are related to cognitive deficits in HIV patients with or without  
703 cocaine abuse. *Neuroimage* 42:869-878

- 704 Denton AR (2019) *Behavioral and Voltammetric Analysis of Chronic Escitalopram Treatment to*  
705 *the HIV-1 Transgenic Rat: Implications for Comorbid HIV-1 and Clinical Depression.*  
706 (Master's Thesis). Retrieved from <https://scholarcommons.sc.edu/etd/5287>
- 707 Denton AR, Samaranayake SA, Kirchner KN, Roscoe RF, Berger SN, Harrod SB, Mactutus CF,  
708 Hashemi P, Booze RM (2019) Selective monoaminergic and histaminergic circuit  
709 dysregulation following long-term HIV-1 protein exposure. *J Neurovirology* 25: 540-550
- 710 Di Matteo V, De Blasi A, Di Giulio C, Esposito E (2001). Role of 5-HT<sub>2C</sub> receptors in the control  
711 of central dopamine function. *Trends Pharmacol Sci* 22:229-232.
- 712 Do AN, Rosenberg ES, Sullivan PS, Beer L, Strine TW, Schulden JD, Fagan JL, Freedman MS,  
713 Skarbinski J. (2014) Excess burden of depression among HIV-infected persons receiving  
714 medical care in the United States: Data from the medical monitoring project and the  
715 behavioral risk factor surveillance system. *PloS One* 9: e92842
- 716 Egenrieder L, Mitricheva E, Spanagel R, Noori HR (2020) No basal or drug-induced sex  
717 differences in striatal dopaminergic levels: a cluster and meta-analysis of rat  
718 microdialysis studies. *J Neurochem* 4:482-492
- 719 Ellis RJ, Calero P, Stockin MD (2009) HIV infection and the central nervous system: a primer.  
720 *Neuropsychol Rev* 19:144–151
- 721 Everall IP, Heaton RK, Marcotte TD, Ellis RJ, McCutchan JA, Atkinson JH, Grant I, Mallory M,  
722 Masliah E (1999) Cortical synaptic density is reduced in mild to moderate human  
723 immunodeficiency virus neurocognitive disorder. *Brain Pathol* 9:209–217 (HNRC Group.  
724 HIV Neurobehavioral Research Center)
- 725 Farinpour R, Miller EN, Satz P, Selnes OA, Cohen BA, Becker JT (2003) Psychosocial risk  
726 factors of HIV morbidity and mortality: findings from the Multicenter AIDS Cohort Study  
727 (MACS). *J Clin Exp Neuropsychol* 25:654-670

- 728 Ferris MJ, Frederick-Duus D, Fadel J, Mactutus CF, Booze RM (2009) In vivo microdialysis in  
729 awake, freely moving rats demonstrates HIV-1 Tat-induced alterations in dopamine  
730 transmission. *Synapse* 63:181-185
- 731 Festa LK, Irollo E, Platt BJ, Tian Y, Floresco S, Meucci O (2020) CXXL12-induced rescue of  
732 cortical dendritic spines and cognitive flexibility. *eLife* 9:e49717.
- 733 Fitting S, Booze RM, Hasselrot U, Mactutus CF (2008) Differential long-term neurotoxicity of  
734 HIV-1 proteins in the rat hippocampal formation: a design-based stereological study.  
735 *Hippocampus* 18:135-147
- 736 Fitting S, Booze RM, Mactutus CF (2015) HIV-1 proteins, Tat and gp120, target the developing  
737 dopamine system. *Curr HIV Res* 13:21-42
- 738 Green MV, Raybuck JD, Zhang X, Wu MM, Thayer SA. (2019) Scaling synapses in the  
739 presence of HIV. *Neurochem Res* 44: 234-246.
- 740 Hashemi P, Dankoski EC, Petrovi J, Keithley RB, Wightman RM (2009) Voltammetric detection  
741 of 5-hydroxytryptamine release in the rat brain. *Anal Chem* 81:9462-9471
- 742 Henderson LJ, Johnson TP, Smith BR, Reoma LB, Santamaria UA, [...] Nath A (2019)  
743 Presence of Tat and transactivation response element in spinal fluid despite  
744 antiretroviral therapy. *AIDS* 33:145-157
- 745 Horberg MA, Silverberg MJ, Hurley LB, Towner WJ, Klein DB, Bersoff-Matcha S (2008) Effects  
746 of depression and selective serotonin reuptake inhibitor use on adherence to highly  
747 active3 antiretroviral therapy and on clinical outcomes in HIV-infected patients. *J Acquir*  
748 *Immune Defic Synr* 47:384-390
- 749 Illenberger JM, Harrod SB, Mactutus, CF, McLaurin KA, Kallianpur, A, Booze RM (2020). HIV  
750 infection and neurocognitive disorders in the context of chronic drug abuse: Evidence for  
751 divergent findings dependent upon prior drug history. *J Neuroimmune Pharm*  
752 doi:10.1007/s11481-020-09928-5
- 753 Javadi-Paydar M, Roscoe RF, Denton AR, Mactutus CF, Booze RM (2017) HIV-1 and

- 754 cocaine disrupt dopamine reuptake and medium spiny neurons in female rat striatum.  
755 PloSOne Doi: 10.1371/journal.pone.0188404
- 756 Kesby JP, Markou A, Semenova S (2016) The effects of HIV-1 regulatory TAT protein  
757 expression on brain reward function, response to psychostimulants and delay-dependent  
758 memory in mice. *Neuropharmacology* 109:205–215
- 759 Kesby JP, Markou A, Semenova S (2016) Effects of HIV/TAT protein expression and chronic  
760 selegiline treatment on spatial memory, reversal learning and neurotransmitter levels in  
761 mice. *Behav Brain Res* 311:131–140.
- 762 Kesby JP, Najera JZ, Romoli B, Fang Y, Basova L, Birmingham A, Marcondes MCG, Dulcis D,  
763 Semenova S (2017) HIV-1 Tat protein enhances sensitization to methamphetamine by  
764 affecting dopaminergic function. *Brain Behav Immun* 65:210-221
- 765 Kim HJ, Martemyanov KA, Thayer SA (2008) Human immunodeficiency virus protein Tat  
766 induces synapse loss via a reversible process that is distinct from cell death. *J Neurosci*  
767 28:12604–12613
- 768 Kim HJ, Shin AH, Thayer SA (2011) Activation of cannabinoidtype 2 receptors inhibits HIV-1  
769 envelope glycoprotein gp120-induced synapse loss. *Mol Pharmacol* 80:357–366
- 770 Kumar AM, Ownby RL, Waldrop-Valverde D, Fernandez B, Kumar, M (2011) Human  
771 immunodeficiency virus infection in the CNS and decreased dopamine availability:  
772 relationship with neuropsychological performance. *J Neurovirol* 17:26-40
- 773 Marin RS, Firinciogullari S, Biedrzycki RC (1993) The sources of convergence between  
774 measures of apathy and depression. *J Affect Disord* 28:117-124
- 775 McIntosh RC, Rosselli M, Uddin L, Antoni, M (2015) Neuropathological sequelae of  
776 human immunodeficiency virus and apathy: A review of neuropsychological and  
777 neuroimaging studies. *Neurosci Biobehav Rev* 55:47-164
- 778 McLaurin KM, Booze RM, Mactutus CF (2016). Progression of temporal processing deficits in  
779 the HIV-1 transgenic rat. *Sci Rep*: doi:6:32831.10.1038/srep32831

- 780 McLaurin KM, Booze RM, Mactutus CF (2018) Evolution of the HIV-1 transgenic rat: utility in  
781 assessing the progression of HIV-1 associated neurocognitive disorders. *J Neurovirol*  
782 24:229-245
- 783 McLaurin KA, Booze RM, Mactutus CF, Fairchild AJ (2017) Sex matters: Robust sex differences  
784 in signal detection in the HIV-1 transgenic rat. *Front Behav Neurosci*  
785 doi:103389/fnbeh.2017.00212
- 786 McLaurin KA, Cook AK, Li H, League AF, Mactutus CF, Booze RM (2018). Synaptic connectivity  
787 in medium spiny neurons of the nucleus accumbens: A sex-dependent mechanism  
788 underlying apathy in the HIV-1 transgenic rat. *Front Behav Neurosci* 12:285
- 789 McLaurin KA, Li H, Booze RM, Fairchild AJ, Mactutus CF (2018) Unraveling individual  
790 differences in the HIV-1 transgenic rat: Therapeutic efficacy of methylphenidate. *Sci Rep*  
791 8:136
- 792 McLaurin KA, Li H, Booze RM, Mactutus CF (2019) Disruption of timing: NeuroHIV progression  
793 in the post-cART era. *Sci Rep* 9: 827
- 794 McLaurin KA, Mactutus CF, Booze RM, Fairchild AJ (2019) An empirical mediation analysis of  
795 mechanisms underlying HIV-1-associated neurocognitive disorders. *Brain Res*  
796 1724:146436
- 797 McLaurin KA, Moran LM, Booze RM Mactutus (2020) Selective estrogen receptor beta agonists:  
798 a therapeutic approach for HIV-1 associated neurocognitive disorders. *J Neuroimmune*  
799 *Pharmacol* 15:264-279
- 800 Mills JC, Pence BW, Todd JV, Bengtson AM, Breger TL, Edmonds A (2018) Cumulative burden  
801 of depression and all-cause mortality in women living with HIV. *Clin Infect Dis* 67: 1575-  
802 1581
- 803 Moran LM, Booze RM, Mactutus CF (2013) Time and time again: Temporal processing  
804 demands implicate perceptual and gating deficits in the HIV-1 transgenic rat. *J*  
805 *Neuroimmune Pharmacol* 8: 988-997



806 Moran LM, McLaurin KA, Booze RM, Mactutus CF (2019) Neurorestoration of sustained  
807 attention in a model of HIV-1 Associated Neurocognitive Disorders. *Front Behav*  
808 *Neurosci* 13:169

809 Parsons LH, Justice JB (1993). Perfusate serotonin increases extracellular dopamine in the  
810 nucleus accumbens as measured by in vivo microdialysis. *Brain Research* 2:195-199

811 Paxinos G, Watson C (2014) The rat brain in stereotaxic coordinates. Academic Press, Elsevier

812 Pence BW, Mills JC, Bengtson AM, Gaynes BN, Berger TL, Cook RL (2018) Association of  
813 increased chronicity of depression with HIV appointment attendance, treatment failure,  
814 and mortality among HIV-infected adults in the United States. *JAMA Psychiatry* 74:379-  
815 85.

816 Purohit V, Rapaka R, Shurtleff D (2011) Drugs of abuse, dopamine, and HIV-associated  
817 neurocognitive disorders/HIV-associated dementia. *Mol Neurobiol* 44:102-110

818 Rabkin JG (2008). HIV and depression: 2008 review and update. *Curr. HIV/AIDS Rep* 5:163-  
819 171.

820 Reid W, Sadowska M, Denaro F, Rao S, Foulke J, Hayes N (...) Bryant J (2001) An HIV-1  
821 transgenic rat that develops HIV-related pathology and immunologic dysfunction. *Proc*  
822 *Natl Acad Sci U S A* 98:9271-9276

823 Rodriguez A, Ehlenberger DB, Dickstein DL, Hof PR, Wearne SL (2008). Automated three-  
824 dimensional detection and shape classification of dendritic spines from fluorescence  
825 microscopy images. *PlosOne* 3, doi:10.1371/journal.pone.0001997

826 Roscoe R, Mactutus CF, Booze RM (2014). HIV-1 transgenic female rat: synaptodendritic  
827 alterations of medium spiny neurons in the nucleus accumbens.  
828 *J Neuroimmune Pharmacol* 9:642-653

829 Ruszczycki B, Szepesi Z, Wilczynski G, Bijata M, Kalita K, Kaczmarek L, Wlodarczyk J (2012).  
830 Sampling issues in quantitative analysis of dendritic spines morphology. *BMC*  
831 *Bioinformatics* 13:213

- 832 Sanmarti M, Ibanez L, Huertas S, Badenes D, Dalmau D, Slevain M, (...) Jaen A  
833 (2014) HIV-associated neurocognitive disorders. *J Mol Psy*, 2. Retrieved from  
834 <http://www.jmolecularypsychiatry.com/content/2/1/2>.
- 835 Savetsky JB, Sullivan LM, Clarke J, Stein MD, Sarnet JH (2001). Evolution of depressive  
836 symptoms in human immunodeficiency virus-infected patients entering primary care. *J*  
837 *Nerv Ment Dis* 189: 76-83
- 838 Saylor RA, Hersey M, West A, Buchanan AM, Berger SM, Nijhout HF, (...) Hashemi P. (2019) In  
839 vivo hippocampal serotonin dynamics in male and female mice: Determining effects of  
840 acute escitalopram using fast scan cyclic voltammetry. *Front Neurosci* 13: 362
- 841 Shaskan EG, Snyder SH (1970). Kinetics of serotonin accumulation into slices from rat brain:  
842 relationship to catecholamine uptake. *J Pharmacol Exp Ther* 175: 404-418
- 843 Sholl, DA (1953) Dendritic organization in the neurons of the visual and motor cortices of the  
844 cat. *J Anat* 87: 387–406
- 845 Silvers JM, Aksenov MY, Akensova MV, Beckly J, Olton P, Mactutus CF, Booze RM (2006)  
846 Dopaminergic marker proteins in the substantia nigra of human immunodeficiency virus  
847 type 1- infected brains. *J Neurovirol* 12:40-145
- 848 Sinharay S, Lee D, Shah S, Muthusamy S, Papadakis GZ, Ahang X, Maric D, Reid WC,  
849 Hammound, DA (2017) Cross-sectional and longitudinal small animal PET shows pre  
850 and post-synaptic striatal dopaminergic deficits in an animal model of HIV. *J Nuc Med*  
851 55:27-33
- 852 Spudich S, Robertson KR, Bosch RJ, Gandhi RT, Cyktor JC, Mar H, [...] Mellors JW (2019).  
853 Persistent HIV-infected cells in cerebrospinal fluid are associated with poorer  
854 neurocognitive performance. *J Clin Invest* 129:3339-3346
- 855 Strauss M, O'Donovan B, Ma Y, Xial Z, Lin S, Bardo MT, Ortinski PI, McLaughlin JP, Zhu J  
856 (2020) [3H] dopamine uptake through the dopamine and norepinephrine transporters is

857 decreased in the prefrontal cortex of transgenic mice expressing HIV-1 transactivator or  
858 transcription. *J Pharmacol Exp Ther* 374:241-251

859 Toggas SM, Masliah E, Rockenstein EM, Rall GF, Abraham CR, Mucke L (1994) Central  
860 nervous system damage produced by expression of the HIV-1 coat protein gp120 in  
861 transgenic mice. *Nature* 367:188–193

862 Van Bockstaele EJ, Pickel VM (1993). Ultrastructure of serotonin-immunoreactive terminals in  
863 the core and shell of the rat nucleus accumbens: Cellular substrates for interactions with  
864 catecholamine afferents. *J Comp Neurol* 33:603-617.

865 Vigorito M, Connaghan KP, Chang SL (2015) The HIV-1 transgenic rat model of neuroHIV.  
866 *Brain Behav Immun* 48:336-349

867 West A, Best J, Abdalla A, Nijhout HF, Reed M, Hashemi P. (2018). Voltammetric evidence for  
868 discrete serotonin circuits, linked to specific reuptake domains, in the mouse medial  
869 prefrontal cortex. *Neurochem Int* 123:50-58.

870 Westwood FR (2008) The female rat reproductive cycle: a practical histological guide to staging.  
871 *Toxicol Pathol* 36:375-384

872 Yoo-Jeong M, Waldrop-Valverde D, McCoy K, Ownby RL (2016) A structural equation model of  
873 HIV- related symptoms, depressive symptoms, and medication adherence. *J HIV AIDS*  
874 2:1-15

875 Yuste, R (2010) *Dendritic Spines*. MIT Press

876

877

878

879 **Figure Captions**

880 **Figure 1:** Experimental Design. Rats (N=73; HIV-1 Tg, n=31; F344/N, n=42; Males, n=36;  
881 Females, n=44) were implanted with a subcutaneous pellet of escitalopram and allowed to  
882 habituate to the 14.76 mg pellet of escitalopram for 1 week. Following this initial week, rats were  
883 tested in each behavioral task during the subsequent 4 weeks. Directly after the conclusion of  
884 behavioral testing, rats were implanted with electrodes for FSCV recording (n=40) or sacrificed  
885 for dendritic spine analysis (n=33).

886  
887 **Figure 2:** Sucrose preference testing. Five bottle sucrose preference test using a 0%, 1%, 5%  
888 10% and 30% concentration. **A.** Dose-dependent responding to sucrose concentrations  
889 proceeded in a robust linear fashion ( $r^2 > 0.97$ ) in F344/N control animals whereas, in contrast,  
890 dose-dependent responding in HIV-1 Tg animals proceeded in a prominent quadratic fashion  
891 (one-phase association,  $r^2 > 0.97$ ). **B.** The difference in dose-response functions was not  
892 confounded with any positional or side bias of the animals as illustrated by mean sucrose  
893 consumption from each bottle position. **C.** Escitalopram did not alter sucrose consumption in the  
894 F344/N control animals; the dose-dependent sucrose consumption analysis revealed a global  
895 linear fit independent of escitalopram treatment ( $r^2 = 0.92$ ). **D.** However, for the HIV-1 Tg animals,  
896 escitalopram treatment restored the quadratic dose-response function ( $r^2 > 0.97$ ) to a prominent  
897 linear function ( $r^2 = 0.88$ ).

898  
899 **Figure 3:** **A.** Exploration in the modified hole board, as indexed by nose poke behavior, was  
900 sensitive to the effect of both genotype and escitalopram treatment [genotype X escitalopram  
901 interaction,  $F(1, 56) = 12.18$ ,  $p \leq 0.0009$ ]. **Left panel.** The HIV-1 Tg animals displaying a greater  
902 number (>70%) of nose pokes than F344/N controls [ $F(1, 56) = 10.01$ ,  $p \leq 0.0025$ ]. **Right panel.**  
903 Escitalopram treatment significantly decreased the number of nose pokes in HIV-1 Tg animals  
904 towards the levels of F344/N placebo controls [ $F(1, 56) = 5.28$ ,  $p \leq 0.025$ ]. In contrast,

905 escitalopram treatment increased the number of nose pokes in F344/N controls significantly  
906 above their placebo levels, an effect driven by the female animals [F(1, 56) =7.92, p≤0.007].

907 **B.** Exploration time in the open arm of an elevated plus maze apparatus. **Left panel.**

908 Exploration time in the elevated plus maze was not sensitive to an effect of the HIV-1 transgene  
909 [F(1, 72) =2.46, p>0.10], an effect clearly absent in females [F(1, 72) <1.0] but also not robust in  
910 the males [F(1, 72) =3.69, p=0.059]. **Right panel.** In the absence of a genotype effect, the  
911 evidence for an effect of escitalopram therapy was not expected nor observed.

912 **C.** Social interaction time. Animals were tested with a novel sex and bodyweight matched

913 partner in a novel cage across a ten minute trial period. **Left panel.** Total interaction time,

914 recorded as the dependent measure of social behavior was insensitive to the effects of the HIV-  
915 1 transgene, escitalopram treatment, or their interaction [all Fs < 1.0]. **Right panel.** In the

916 escitalopram treated animals [F(1,66)=6.67, p≤0.012] a genotype by sex effect was observed

917 with M>F in F344/N vs F>M in HIV-1 Tg animals. The modulation of social behavior by

918 escitalopram was not expected nor particularly relevant to its therapeutic potential given the

919 insensitivity of the task to a genotype effect.

920

921 **Figure 4:** Visual Prepulse inhibition. Animals were tested during one session following a

922 habituation session which occurred the day before. Visual PPI was sensitive to both genotype

923 and escitalopram treatment. **A.** As illustrated, a significant main effect of genotype

924 [F(1,34)=10.26, p≤0.0029] accompanied by a prominent quadratic ISI by genotype interaction

925 [F(1,34)=12.02, p≤0.0014] demonstrated a significant impairment in preattentive processing of

926 the HIV-1 Tg animals relative to F344/N controls, i.e., the response amplitudes of the HIV-1 Tg

927 animals were significantly less sensitive to response modulation by the ISI than F344/N controls

928 [F(5,170)=5.31, p≤0.005]. **B.** There was no effect of sex nor interaction of sex with genotype or

929 escitalopram or with ISI [Fs < 1.0]. **C.** Escitalopram treatment did not appear to significantly

930 alter the ISI curves of the F344/N animals. **D.** Escitalopram treatment did however significantly

931 shift the shape of the ISI curves of the HIV-1 Tg animals toward that of the F344/N control  
932 animals, significantly restore functionality [ $F(5,170)=4.08$ ,  $p\leq 0.02$ ].

933

934 **Figure 5:** Auditory Prepulse inhibition Animals were tested during one session following a  
935 habituation session which occurred the day before. Auditory PPI was also sensitive to both  
936 genotype and escitalopram treatment. **A.** As illustrated, a significant main effect of genotype  
937 [ $F(1,37)=9.69$ ,  $p\leq 0.0036$ ] accompanied by a prominent quadratic ISI by genotype interaction  
938 [ $F(1,37)=8.97$ ,  $p\leq 0.005$ ] demonstrated a significant impairment in preattentive processing of the  
939 HIV-1 Tg animals relative to F344/N controls, i.e., the response amplitudes of the HIV-1 Tg  
940 animals were significantly less sensitive to response modulation by the ISI than F344/N controls  
941 [ $F(5,170) = 5.31$ ,  $p\leq 0.008$ ]. **B.** There was no effect of sex nor interaction of sex with genotype or  
942 escitalopram or with ISI [ $F_s < 2.0$ ]. **C.** Escitalopram treatment did not appear to significantly  
943 alter the ISI curves of the F344/N animals. **D.** Although escitalopram treatment appeared to  
944 shift the shape of the ISI curves of the HIV-1 Tg animals toward that of the F344/N control  
945 animals (peak inflection away from 200 msec) restoring functionality, a significant difference did  
946 remain between the two genotype ISI curves [ $F(5,185) = 3.87$ ,  $p\leq 0.038$ ].

947

948 **Figure 6** Fast Scan Cyclic Voltammetry of dopamine **A:** Colorplots for HIV-1 Tg animals (top)  
949 and F344/N animals (bottom). **B.** Stimulus pin implant location (red) and recording carbon fiber  
950 microelectrode (blue). **C.** Evoked dopaminergic potentials for HIV-1 Tg animals (pink) and  
951 F344/N controls (blue). Dopamine peak release was impaired in HIV-1 Tg animals relative to  
952 F344 controls [ $F(1,9)=33.25$ ,  $p\leq 0.001$ ]. Additionally, rates of reuptake were significantly impaired  
953 in the HIV-1 Tg rat [ $F_{344/N} K=0.43$ , HIV-1Tg  $K=0.73$   $F(1,2634)=19.19$ ,  $p\leq 0.01$ ]. **D.** Evoked  
954 dopaminergic potentials for F344/N animals treated with placebo (blue) and F344/N animals  
955 treated with escitalopram (pink). **E.** Evoked dopaminergic potentials for HIV-1 Tg animals  
956 treated with placebo (blue) and HIV-1 Tg animals treated with escitalopram (pink). Escitalopram

957 treatment did not attenuate dopaminergic release deficits in HIV Tg animals [ $F(1,18)=0.123$ ,  
958  $p=ns$ ]. Moreover, rates of reuptake were not significantly different for HIV-1 animals treated with  
959 escitalopram [ $k=0.41$   $F(1,1414)=0.47$ ,  $p=ns$ ].

960  
961 **Figure 7.** Fast Scan Cyclic Voltammetry of serotonin **A:** Colorplots for HIV-1 Tg animals (top)  
962 and F344/N animals (bottom). **B.** Stimulus pin implant location (red) and recording carbon fiber  
963 microelectrode (blue). **C.** Evoked serotonergic potentials for HIV-1 Tg animals (pink) and  
964 F344/N controls (blue). Serotonin peak release was impaired in HIV-1 Tg animals relative to  
965 F344 controls  $F(1,16)=60.97$ ,  $p\leq 0.001$ ]. Additionally, rates of reuptake were significantly  
966 impaired in the HIV-1 Tg rat [F344/N  $K=0.37$ , HIV-1Tg  $K=0.56$   $F(1,4314)=7.308$ ,  $p\leq 0.05$ .] **D.**  
967 Evoked serotonergic potentials for F344/N animals treated with placebo (blue) and F344/N  
968 animals treated with escitalopram (pink). **E.** Evoked serotonergic potentials for HIV-1 Tg animals  
969 treated with placebo (blue) and HIV-1 Tg animals treated with escitalopram (pink). Escitalopram  
970 treatment did not attenuate serotonin release deficits in HIV Tg animals, but did marginally  
971 improve peak serotonin concentration in F344 animals [ $F(1,30)=0.99$ ,  $p=ns$ ]. Rates of reuptake  
972 were slower for animals treated with escitalopram than for placebo-treated animals [ $k=0.32$  vs.  
973  $k=0.20$   $F(1,7674)=23.75$ ,  $p\leq 0.01$ ].

974  
975 **Figure 8.** Chronic escitalopram treatment produced increased populations of mushroom  
976 spines. **A:** Relative frequency distributions of dendrite length of MSNs in the nucleus  
977 accumbens are illustrated for placebo controls as a function of genotype; note the leftward shift  
978 in the HIV-1 Tg animals. **B.** Relative frequency distributions of dendrite length of MSNs in the  
979 nucleus accumbens are illustrated for escitalopram treated animals as a function of genotype;  
980 note the reduction in peakedness in the HIV-1 Tg animals. **C-D.** Frequency distributions of  
981 mushroom dendritic spines displayed across concentric radii also showing shifts as a function of  
982 genotype (**C**) and escitalopram (**D**).

983

984 **Figure 9.** Escitalopram treatment dramatically increased dendritic proliferation and connectivity  
985 in HIV-1 Tg rats. **A:** Sholl analysis of dendritic intersections/radii are shown for HIV-1 Tg  
986 animals separated by treatment condition. **B.** Sholl analysis of dendritic intersections/radii are  
987 shown for F344/N animals separated by treatment condition. Treatment with escitalopram  
988 served to dramatically improve dendritic intersections at distal radii in HIV-1 Tg animals  
989 [ $F(1,8)=5.34$ ,  $p<0.05$ ], normalizing dendritic complexity similar to control levels. Confocal images  
990 of medium spiny neurons from the nucleus accumbens are presented for HIV-1 Tg rats treated  
991 with placebo (**C**) and escitalopram (**D**).

992

993 **Figure 10.** Summary of observed effects.



# Experimental Design

Week 1

Implantation of Pellet

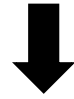

Week 2

Sucrose Preference Testing

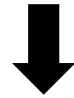

Week 3

Modified Hole Board Testing

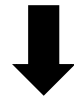

Week 4

Pre-pulse Inhibition Testing

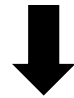

Week 5

Elevated Plus Maze/ Social Interaction

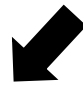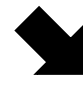

Week 6

FSCV

Spine Analysis

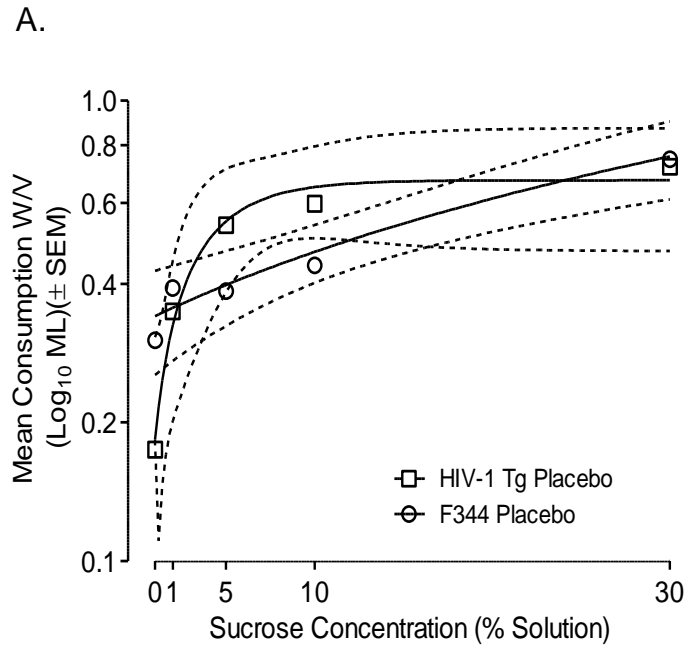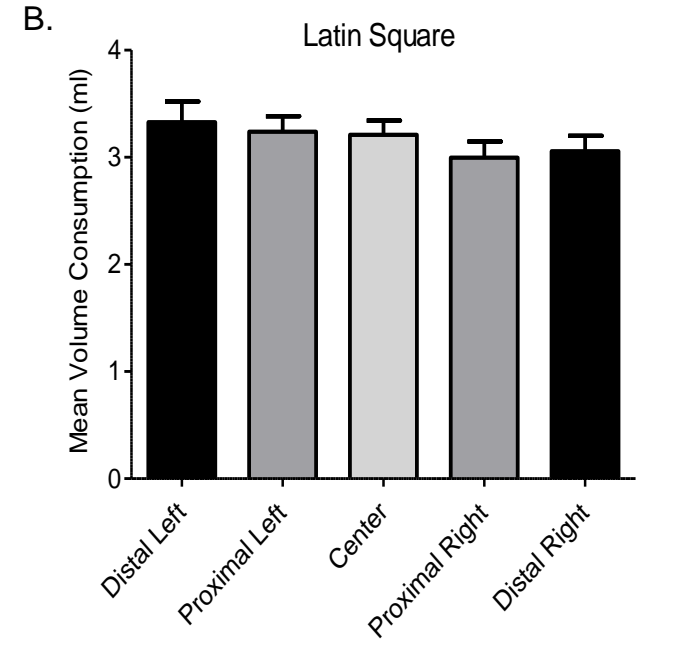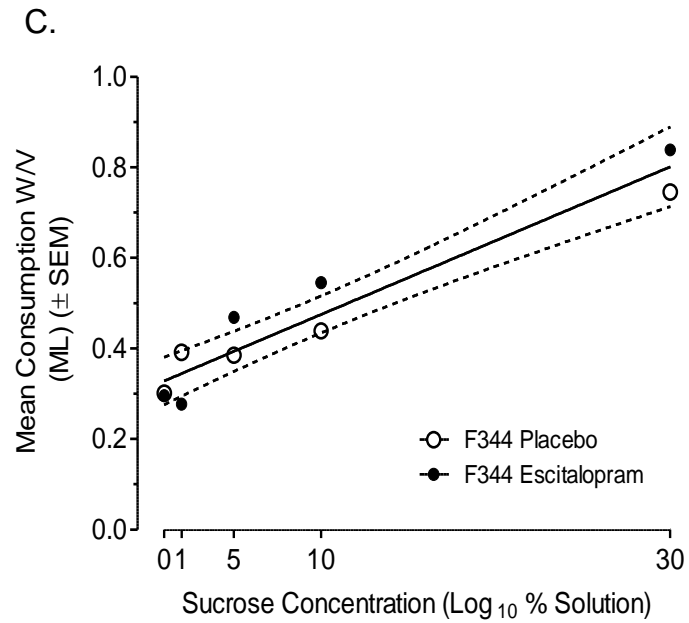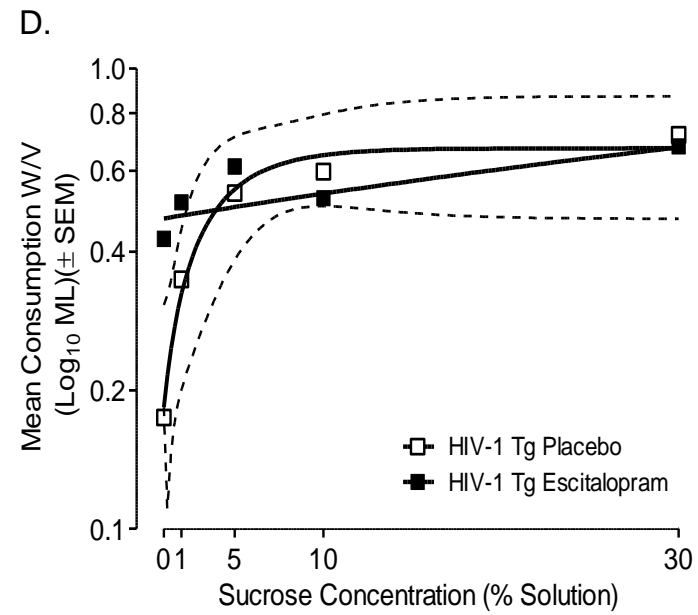

A.

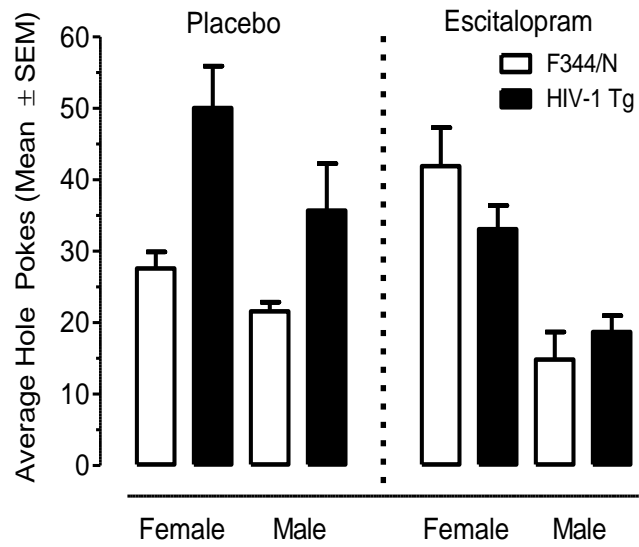

B.

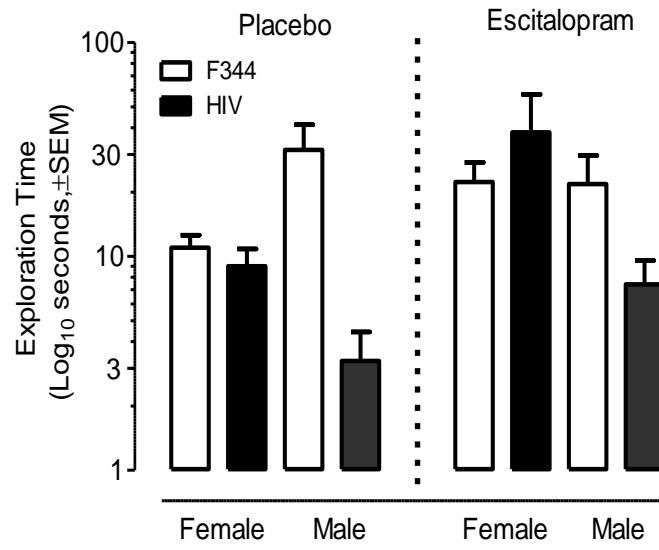

C.

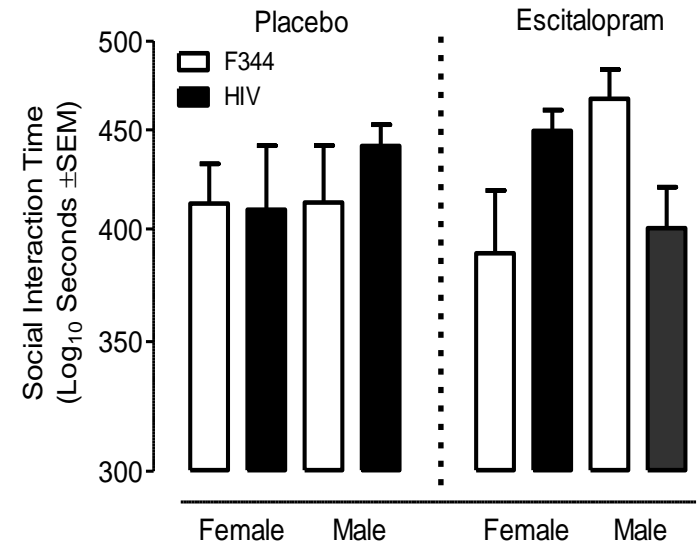

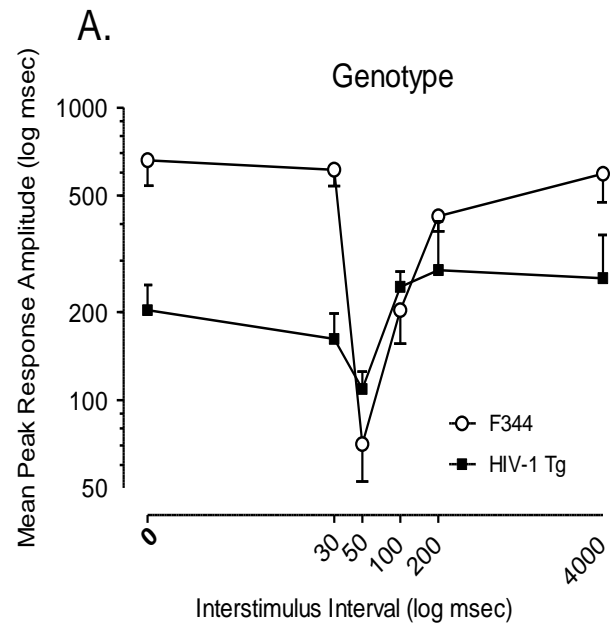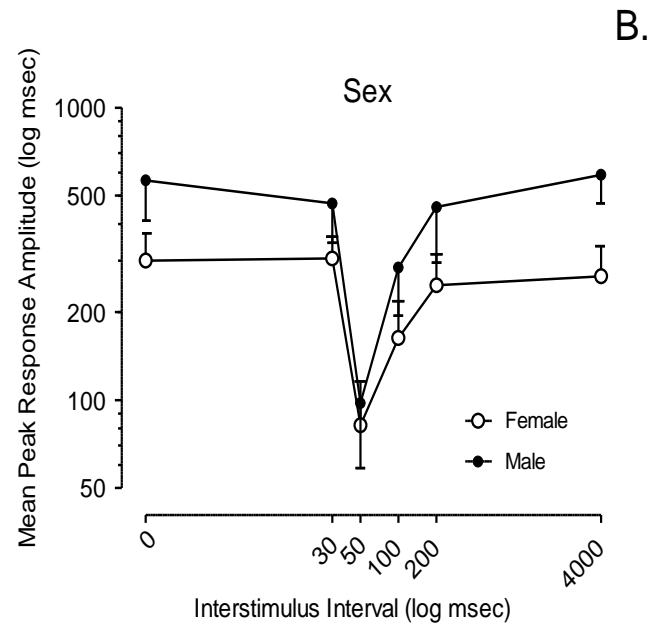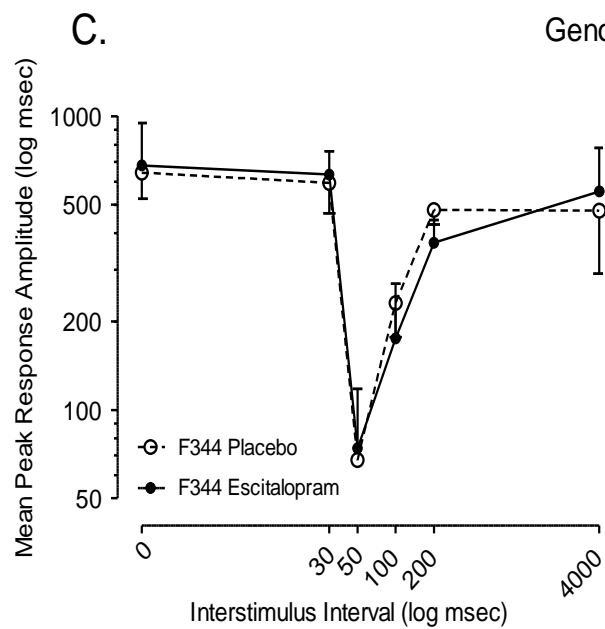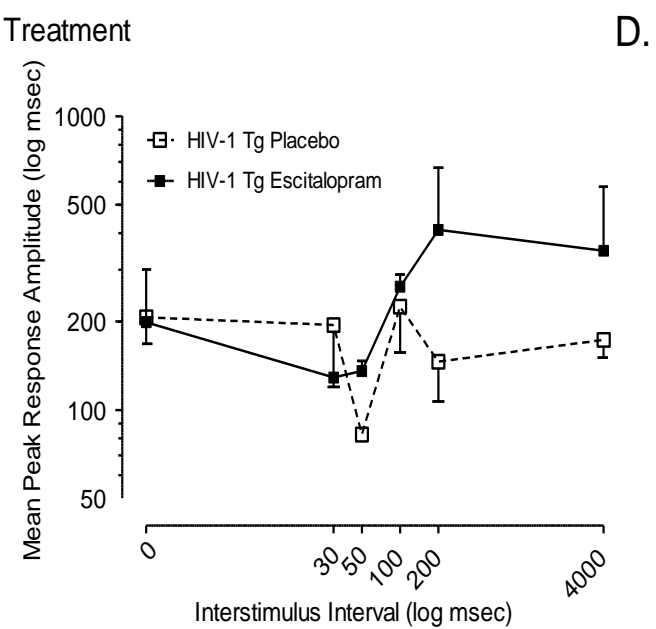

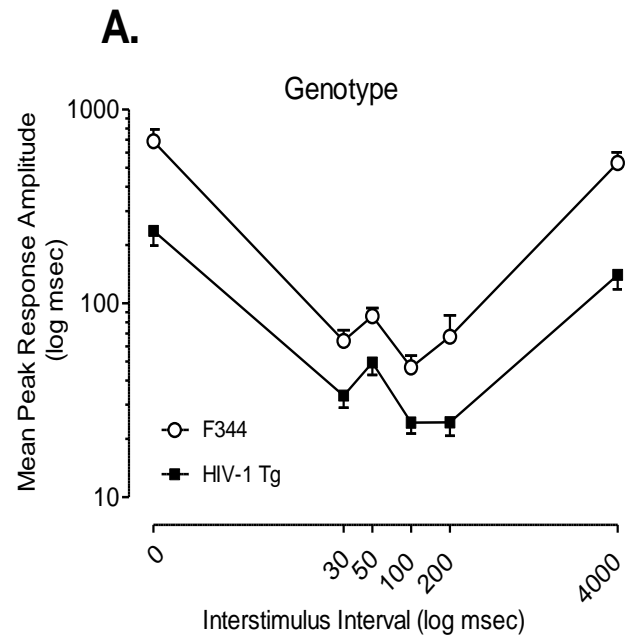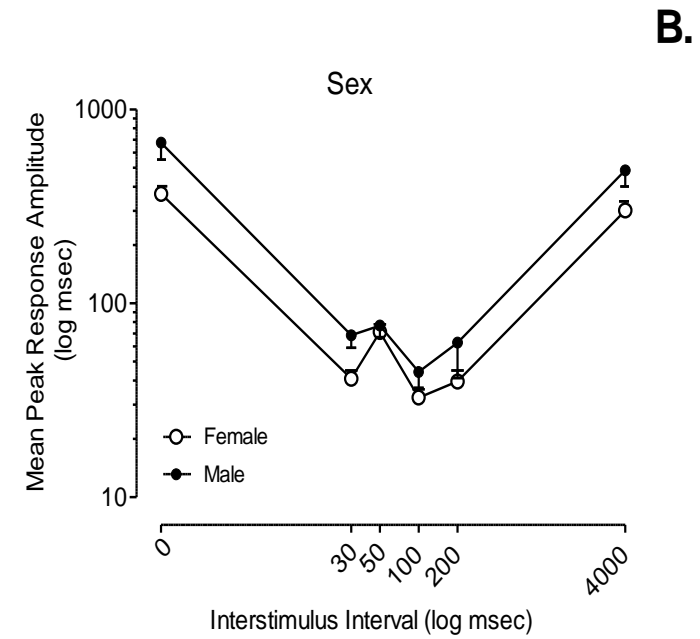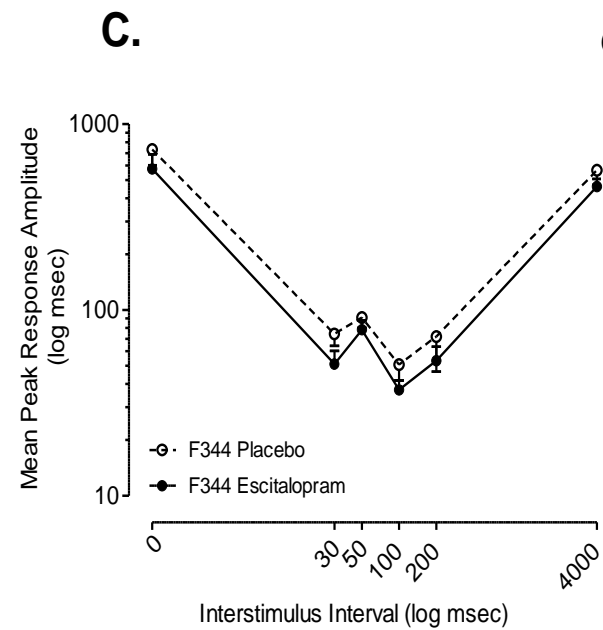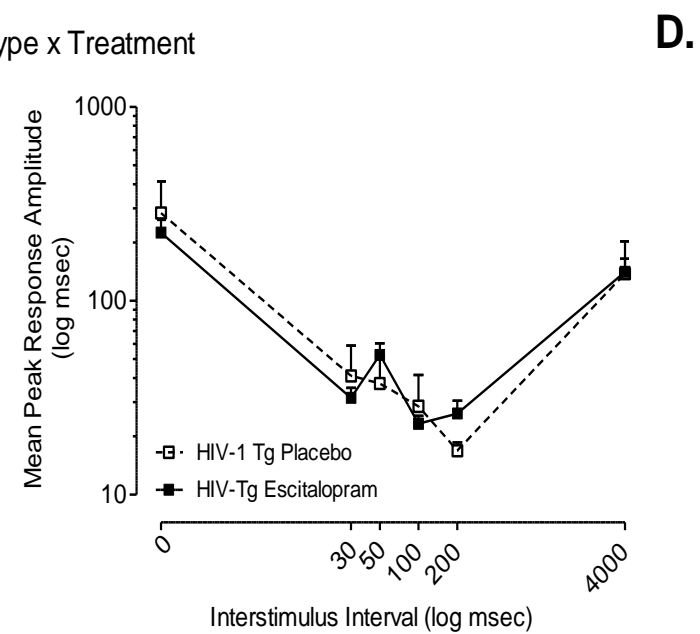

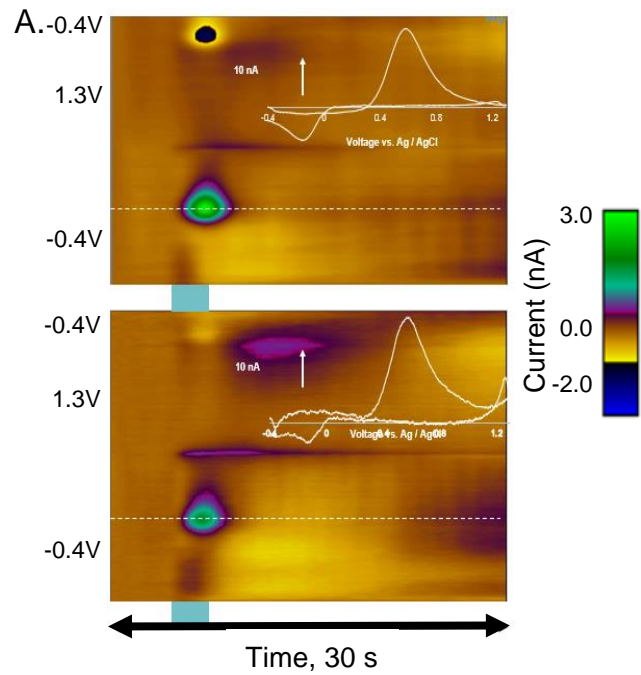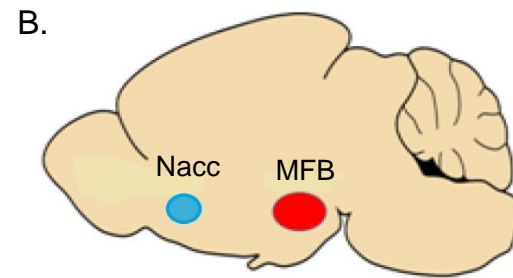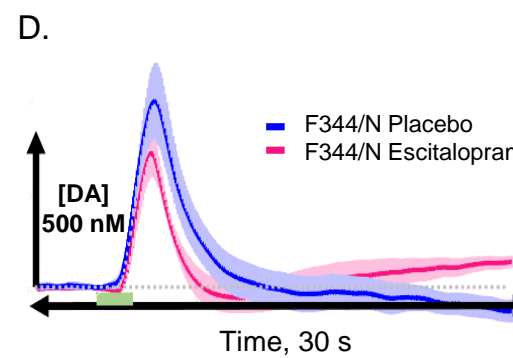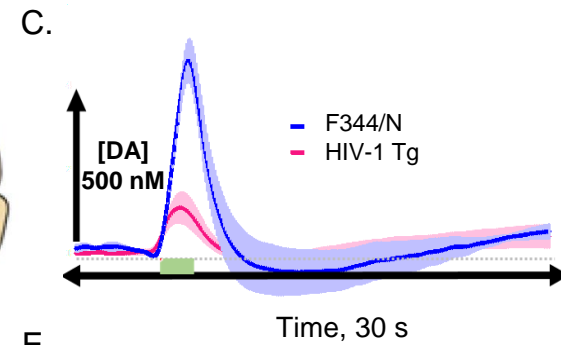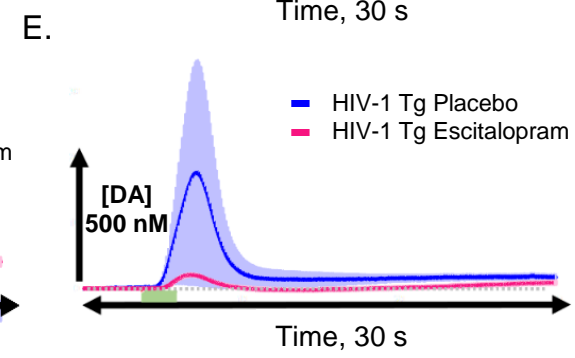

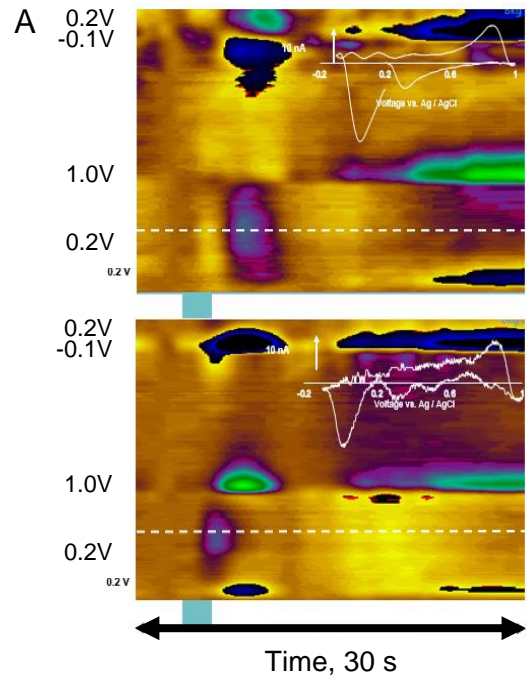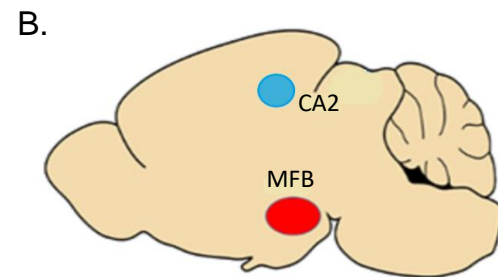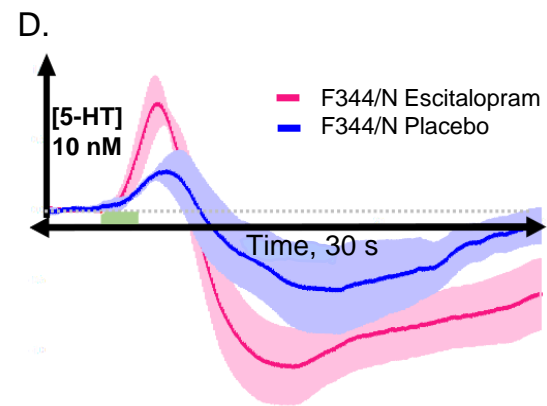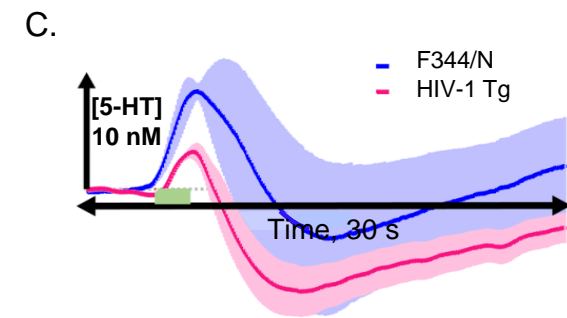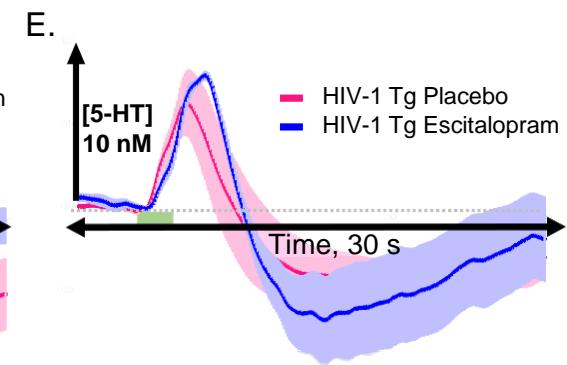

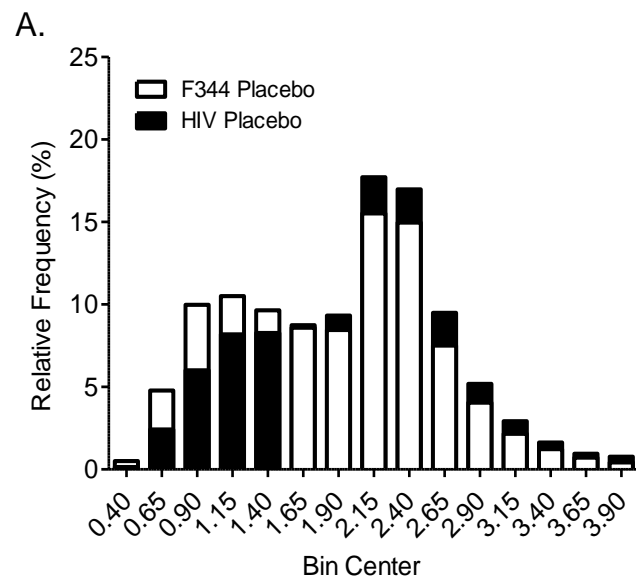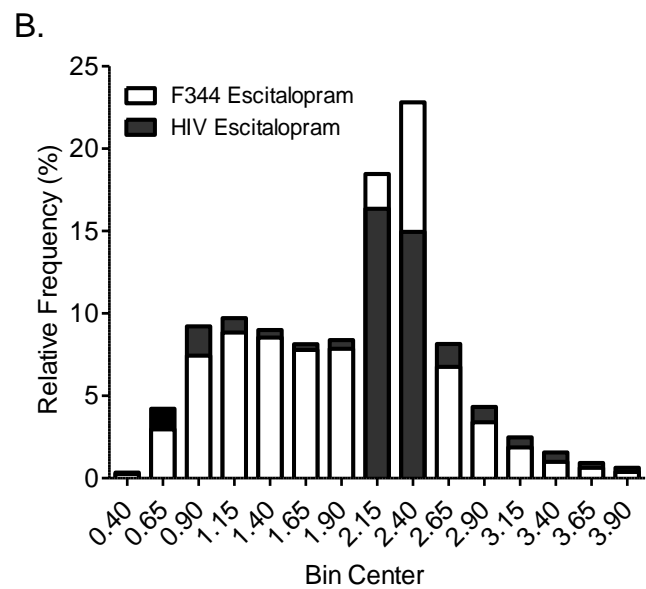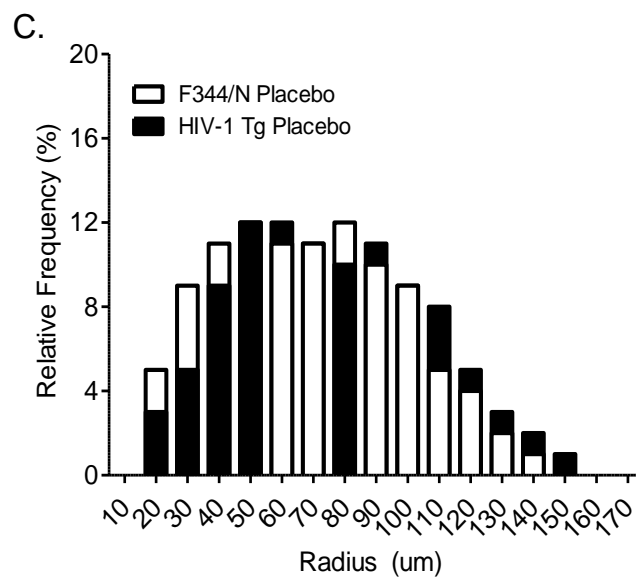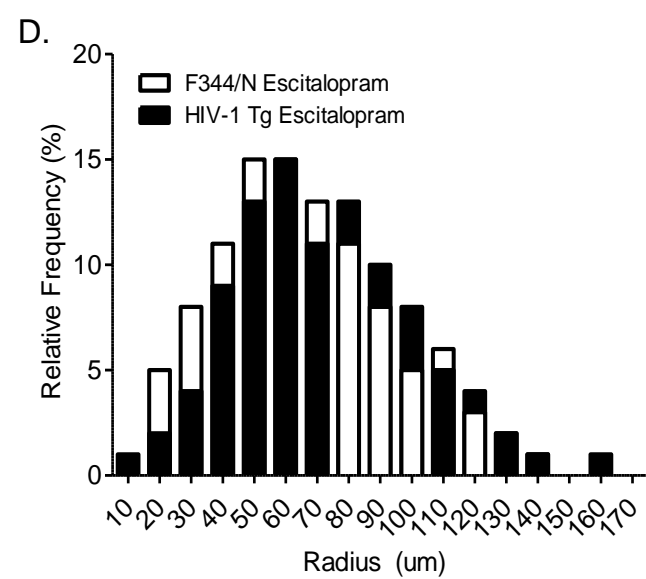



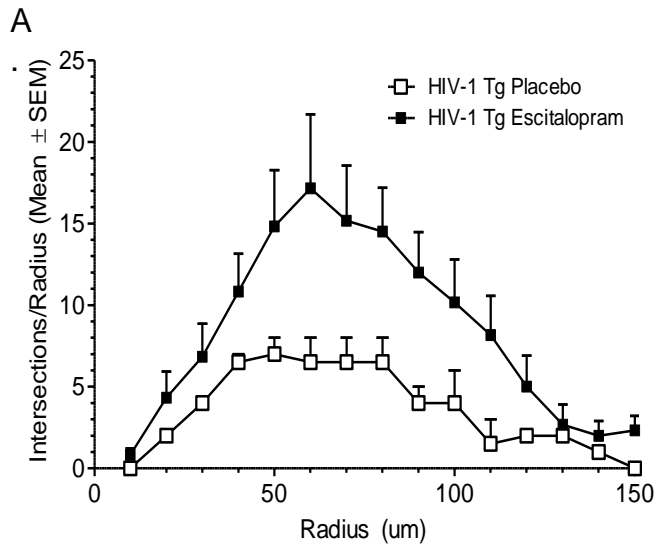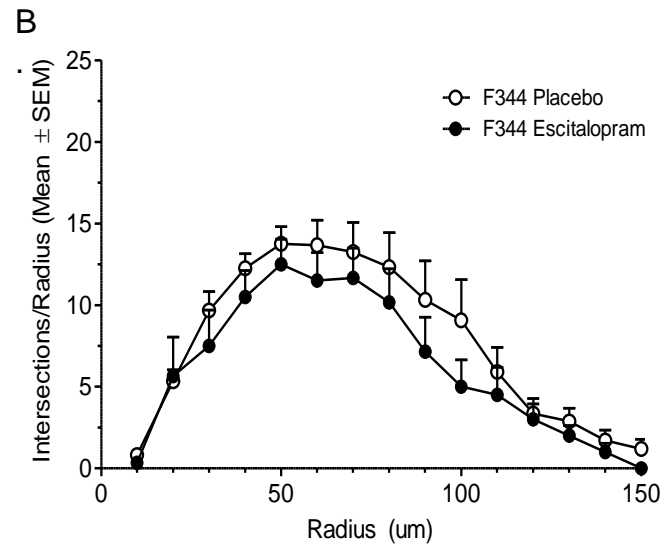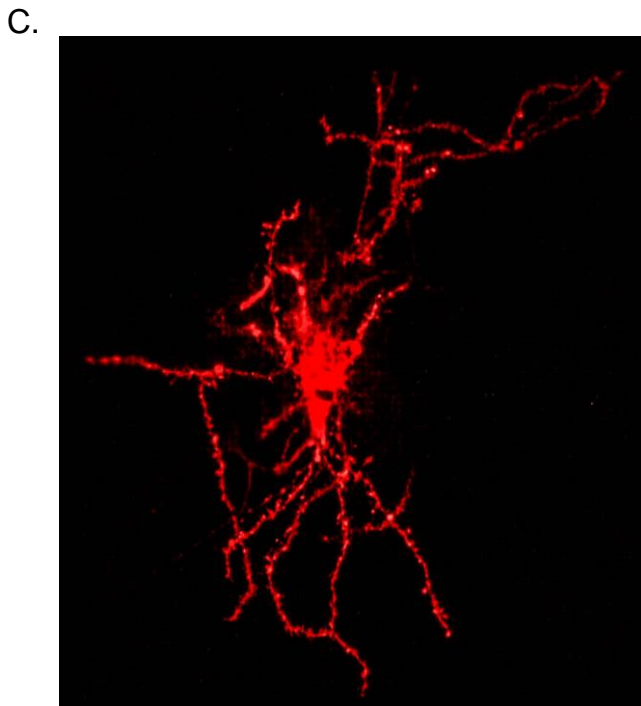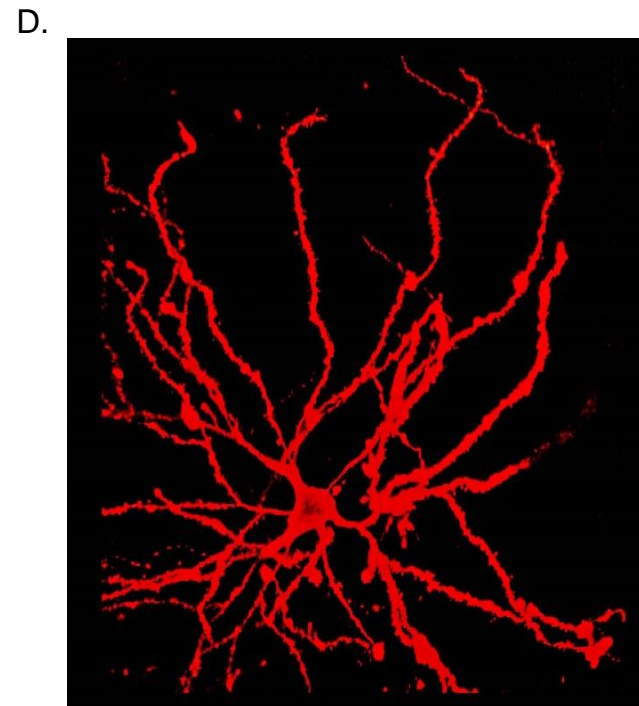

| Dependent Variable                            | Observed Effects                                                                                                                                                                                                                                                                                                                       |
|-----------------------------------------------|----------------------------------------------------------------------------------------------------------------------------------------------------------------------------------------------------------------------------------------------------------------------------------------------------------------------------------------|
| Sucrose Preference                            | Main effect of genotype (HIV-1 Tg impairment)<br>Genotype X concentration interaction<br>No main effects of sex<br>Genotype X treatment interaction; escitalopram restored linear dose-response function.                                                                                                                              |
| Modified Hole Board                           | Main effect of genotype (HIV-1 Tg > F344/N)<br>No main effect of sex<br>Genotype X treatment interaction; escitalopram reduced nose pokes to control levels.                                                                                                                                                                           |
| Elevated Plus Maze                            | Exploration time not sensitive to effect of HIV-1 transgene.<br>No main effect of sex or genotype<br>No interaction effects                                                                                                                                                                                                            |
| Social and Play Behavior                      | Social behavior not sensitive to effect of HIV-1 transgene.<br>No main effect of sex, genotype or treatment<br>Genotype X sex interaction in escitalopram treated animals.                                                                                                                                                             |
| Visual PPI of the Acoustic Startle Response   | Main effect of genotype and genotype x ISI interaction (HIV-1 Tg relatively insensitive to ISI interval)<br>No main effects of sex or treatment<br>Escitalopram significantly shifted ISI curve of HIV-1 Tg animals toward that of F344/N animals.                                                                                     |
| Auditory PPI of the Acoustic Startle Response | Main effect of genotype and genotype x ISI interaction (HIV-1 Tg relatively insensitive to ISI interval)<br>No main effects of sex or treatment<br>Escitalopram significantly shifted ISI curve of HIV-1 Tg animals toward that of F344/N animals.                                                                                     |
| Dopamine Voltammetry                          | Main effect of genotype (HIV-1 Tg impairment)<br>No main effect of sex or treatment<br>No interaction effects                                                                                                                                                                                                                          |
| Serotonin Voltammetry                         | Main effect of genotype (HIV-1 Tg impairment)<br>No main effect of sex or treatment<br>No interaction effects                                                                                                                                                                                                                          |
| Medium Spiny Neuron Branching/Morphology      | Main effect of genotype (HIV-1 impairment)<br>No main effect of sex or treatment<br>Genotype by treatment interaction effect (HIV-1 animals treated with escitalopram displayed altered distributions of spine length and displayed greater dendritic proliferation in addition to increases in stubby and mushroom spine populations) |

bioRxiv preprint doi: <https://doi.org/10.1101/2021.01.11.426210>; this version posted January 11, 2021. The copyright holder for this preprint (which was not certified by peer review) is the author/funder. All rights reserved. No reuse allowed without permission.
